1 **miR-206 family is important for mitochondrial and muscle function, but not**  
2 **essential for myogenesis *in vitro***

3  
4 Roza K. Przanowska<sup>1</sup>, Ewelina Sobierajska<sup>1</sup>, Zhangli Su<sup>1</sup>, Kate Jensen<sup>1</sup>, Piotr  
5 Przanowski<sup>1</sup>, Sarbajeet Nagdas<sup>2</sup>, Jennifer A. Kashatus<sup>2</sup>, David F. Kashatus<sup>2</sup>, Sanchita  
6 Bhatnagar<sup>1,3</sup>, John R. Lukens<sup>4</sup>, Anindya Dutta<sup>1\*</sup>

7  
8 <sup>1</sup> Department of Biochemistry and Molecular Genetics, University of Virginia School of  
9 Medicine, Pinn Hall 1232, Charlottesville, Virginia 22908, USA.

10 <sup>2</sup> Department of Microbiology, Immunology and Cancer Biology, University of Virginia  
11 School of Medicine, Charlottesville, Virginia 22908, USA.

12 <sup>3</sup> Department of Neuroscience, University of Virginia School of Medicine, Charlottesville,  
13 Virginia 22908, USA.

14 <sup>4</sup> Center for Brain Immunology and Glia, Department of Neuroscience, School of  
15 Medicine, University of Virginia, Charlottesville, Virginia 22908, USA.

16 \* Corresponding author: [ad8q@virginia.edu](mailto:ad8q@virginia.edu)

17 **Abstract**

18 *miR-206*, *miR-1a-1* and *miR-1a-2* are induced during differentiation of skeletal myoblasts  
19 and promote myogenesis *in vitro*. *miR-206* is required for skeletal muscle regeneration  
20 *in vivo*. Although this microRNA family is hypothesized to play an essential role in  
21 differentiation, a triple knockout of the three genes has not been done to test this  
22 hypothesis. We report that triple KO C2C12 myoblasts generated using CRISPR/Cas9  
23 method differentiate despite the expected de-repression of the microRNA targets.  
24 Surprisingly, their mitochondrial function is diminished. Triple KO mice demonstrate  
25 partial embryonic lethality, most likely due to the role of miR-1a in cardiac muscle  
26 differentiation. Two triple KO mice survive and grow normally to adulthood with smaller  
27 myofiber diameter and diminished physical performance. Thus, unlike other microRNAs  
28 important in other differentiation pathways, the *miR-206* family is not absolutely essential  
29 for myogenesis and is instead a modulator of optimal differentiation of skeletal  
30 myoblasts.

31

32 **Keywords**

33 myomiRs, skeletal muscle differentiation, myogenesis, miR-1a-1, miR-1a-2, miR-206,  
34 embryonic lethality, mitochondria function, muscle function

## 35 **Introduction**

36           The downregulation of pluripotency markers and activation of lineage-specific  
37 gene expression during differentiation allow for accurate development. Differentiation-  
38 induced microRNAs play a major role in this process by repressing their targets – genes  
39 responsible for self-renewal. Depletion of DGCR8 protein essential for biogenesis of  
40 microRNA in pluripotent cells decreases most active microRNA levels and inhibits  
41 differentiation (Wang et al., 2007). Since many microRNAs are induced during  
42 differentiation of specific tissue lineages, several of them have been tested for their  
43 importance in differentiation, particularly whether they act as a switch that is essential for  
44 differentiation, or as a modulator of differentiation. MicroRNAs regulate processes as  
45 early as gastrulation (Choi et al., 2007; Rosa et al., 2009), neural development (Delaloy  
46 et al., 2010; Krichevsky et al., 2006; Zhao et al., 2009), muscle development (Chen et  
47 al., 2006; Cordes et al., 2009; Dey et al., 2012; Sarkar et al., 2010; Zhao et al., 2005),  
48 bone formation (Li et al., 2009; Li et al., 2008), skin development (Jackson et al., 2013;  
49 Wang et al., 2013) and hematopoiesis (Chen et al., 2004; Garzon and Croce, 2008; Zhu  
50 et al., 2013). Many of the studied microRNAs have been suggested to be essential, e.g.  
51 *miR-206* and *miR-1a* for skeletal muscle myoblast differentiation (Chen et al., 2010; Dey  
52 et al., 2011), *miR-144/451* for erythroid cells differentiation (Dore et al., 2008;  
53 Rasmussen et al., 2010), *miR-17~92* during B lymphopoiesis and lung development  
54 (Ventura et al., 2008), *miR-15a-1* and *miR-18a* for development and function of inner ear  
55 hair cells in vertebrates (Friedman et al., 2009), *miR-219* for normal oligodendrocyte  
56 differentiation and myelination (Dugas et al., 2010), *miR-204* for differentiation of the  
57 retinal pigmented epithelium (Ohana et al., 2015) and *miR-375* for human spinal motor  
58 neuron development (Bhinge et al., 2016).

59           Myogenesis is a process of muscular tissue formation, which first occurs in  
60 vertebrate embryonic development (Parker et al., 2003), but also happens in adult  
61 muscle regeneration (Chargé and Rudnicki, 2004). The skeletal muscle satellite cells are  
62 the myogenic stem cells of adult muscles residing between the sarcolemma and basal  
63 lamina of muscle fibers (Mauro, 1961). In normal conditions these tissue specific stem  
64 cells stay in a quiescent G0 state (Cheung and Rando, 2013). Upon activation by injury  
65 or disease, they re-enter the cell cycle to establish a population of skeletal muscle  
66 progenitors (myoblasts), which differentiate further and fuse to produce myotubes. The  
67 major regulator of this process is *Pax7* transcription factor (Olguín and Pisconti, 2012;  
68 Zammit et al., 2006). The satellite cells express the transcription factor *Pax7* in G0 and  
69 when activated, coexpress *Myod1*. Downregulation of *Pax7* leads to differentiation into  
70 myotubes, whereas downregulation of *Myod1* leads to a return to quiescence. An  
71 important player in *Pax7* downregulation and differentiation induction is *miR-206* (Chen  
72 et al., 2010; Dey et al., 2011). Other microRNAs are also known to play important roles  
73 in skeletal muscle differentiation. A conditional skeletal muscle specific knockout of *Dicer*  
74 in mice leads to global loss of miRNAs in developing skeletal muscle, resulting in  
75 widespread apoptosis and abnormal myofiber morphology (O'Rourke et al., 2007). Over  
76 the last 14 years *miR-206*, *miR-1a-1* and *miR-1a-2* have been hypothesized to not only  
77 be very important for muscle differentiation, but also essential for this process (Anderson  
78 et al., 2006; Chen et al., 2006; Chen et al., 2010; Dey et al., 2011; Gagan et al., 2012;  
79 Goljanek-Whysall et al., 2012; Heidersbach et al., 2013; Hirai et al., 2010; Kim et al.,  
80 2006; Koutsoulidou et al., 2011; Kwon et al., 2005; Mishima et al., 2009; Rao et al.,  
81 2006; Sokol and Ambros, 2005; Sweetman et al., 2008; Vergara et al., 2018; Wystub et  
82 al., 2013; Wüst et al., 2018; Yuasa et al., 2008; Zhao et al., 2007; Zhao et al., 2005).

83 *miR-206*, *miR-1a-1* and *miR-1a-2* are members of the myomir family and are expressed  
84 from bicistronic loci. Interestingly, *miR-206* and *-1a* have an 18/21 base match in  
85 sequence with each other and complete identity in the first eight nucleotides that  
86 constitute the seed sequence for target recognition. Even though all three are expressed  
87 in skeletal muscles, *miR-1a-1* and *miR-1a-2* are also expressed in cardiac muscle,  
88 where *miR-206* is not expressed (Kim et al., 2006; Sempere et al., 2004). All three are  
89 upregulated during murine skeletal myoblast differentiation (Kim et al., 2006).  
90 Overexpression of *miR-206* induces C2C12 differentiation, whereas simultaneous  
91 knockdown of *miR-206* and *miR-1a* results in diminished differentiation (Kim et al.,  
92 2006). Based on this it was hypothesized that the three microRNAs collectively are  
93 essential for skeletal muscle differentiation.

94 Knockout of the *miR-206* gene produced viable mice with no defect in skeletal  
95 muscle development, although there was a defect in skeletal muscle regeneration after  
96 extensive muscle injury (Liu et al., 2012). The loss of *miR-206* in mice modeling  
97 amyotrophic lateral sclerosis leads to faster disease progression and lack of  
98 regeneration of neuromuscular synapses, again suggesting a role of the microRNA in  
99 response to tissue injury. In contrast, there was high embryonic lethality of *miR-1a-2*  
100 knockout mice caused by various cardiac problems (Zhao et al., 2007). Although *miR-*  
101 *1a-1* knockout showed embryonic lethality in the 129 genetic background animals,  
102 knockout pups were obtained at the expected frequency in a mixed genetic background,  
103 proving that the *miR-1a-1* knockouts can produce viable mice (Heidersbach et al., 2013).  
104 Although the double KO of *miR-1a-1* and *miR-1a-2* was found to have high embryonic  
105 lethality, some mice survived with normal skeletal muscle development. By 10th  
106 postnatal day, however, all double knockout animals were dead because of serious

107 cardiac defects (Heidersbach et al., 2013). Moreover, knockout of two bicistronic loci  
108 (*miR-1a-1/133a-2* and *miR-1a-2/133a-1 dKO*) showed complete embryonic lethality at  
109 embryonic stage E11.5 (Wystub et al., 2013). The *miR-1a/133a* skeletal muscle specific  
110 dKO mice were alive, but had metabolic problems caused by incorrect functioning of  
111 mitochondria (Wüst et al., 2018).

112 Overall, all animals had relatively normal skeletal muscle development, and this  
113 could be explained because at least one myomir remained intact in all these animals. A  
114 complete knockout of all three microRNAs, *miR-206*, *miR-1a-1* and *miR-1a-2*, tests  
115 whether an essential role of these myomiRs in myogenesis was masked by the  
116 redundant function of the microRNA left in the cells. Here, we show that *miR-206*, *miR-*  
117 *1a-1* and *miR-1a-2* are not essential for skeletal muscle differentiation, but they are  
118 required for normal muscle formation and function. By analyzing triple KO C2C12  
119 clones, we demonstrate that the myoblasts differentiate, although with decreased  
120 mitochondrial function. Additionally, triple KO animals reveal the three microRNA are not  
121 essential for muscle formation, but their absence causes defects in physical  
122 performance and myofiber width. Our results indicate that although *miR-206*, *miR-1a-1*  
123 and *miR-1a-2* are important for skeletal muscles and especially for their optimal function,  
124 they are not essential for myogenesis. Thus, this microRNA family, first discovered  
125 because of their induction during differentiation of stem cells and their ability to induce  
126 differentiation-specific genes, is not essential to trigger a differentiation switch, but is  
127 involved in modulating differentiation. In addition, it is surprising that the *miR-206* family  
128 and *miR-133a* are independently required for mitochondrial function even though they  
129 repress different gene targets.

130 **Results**

131

132 *miR-206, miR-1a-1 and miR-1a-2 are not essential for C2C12 myoblasts differentiation*

133

134 To determine whether *miR-206* and *miR-1a* are necessary for murine myoblast  
135 proliferation and differentiation, we designed 6 different sgRNAs to delete all three  
136 genes at once (Figure 1A, Table S1). To increase knockout efficiency, we used C2C12  
137 cell line with stable overexpression of Tet-inducible Cas9. miRNA gene deletions were  
138 confirmed by PCR on genomic DNA (Figure 1B) and Sanger sequencing of PCR  
139 products (Figure 1C). We didn't detect any pre-miRNA or miRNA left in our triple KO  
140 (tKO) clones (Figure 1D and S1A). To ensure the reproducibility of our results we  
141 obtained triple KO clones independently from PAX7 negative (Figure 1A-D) and PAX7  
142 positive (Figure S1) C2C12 myoblasts.

143 C2C12 clones lacking *miR-206* and *miR-1a* differentiate upon serum starvation  
144 producing similar levels of promyogenic mRNAs: *Myod1*, *Myogenin* and *Myh3* as control  
145 cells (Figure 1E). The tKO clones also produce the corresponding proteins, which  
146 include markers of early (MYOGENIN) and late myogenesis (MHC), though their levels  
147 are lower in the PAX7 negative tKO cells (Figure 1F). In PAX7 positive tKO clones the  
148 *Myod1*, *Myogenin* and *Myh3* mRNAs are induced normally during differentiation (Figure  
149 S1B), but we observe similar levels of MYOGENIN protein and slightly decreased MHC  
150 protein (Figure S1C). Moreover, the fusion index counted in the PAX7 positive cells  
151 (Figure 1G) shows there is no morphological differences upon differentiation between  
152 the control and tKO cells.

153

154 *Although triple KO C2C12 clones differentiate they are impaired in metabolic*  
155 *performance*

156  
157 By RNA-seq the triple KO clones differentiated efficiently as confirmed by  
158 hierarchical clustering which shows the differentiating tKO cells cluster with the  
159 differentiating wild type cells, separate from proliferating cells (Figure 2A). Nevertheless,  
160 531 and 412 genes were differentially expressed in tKO in comparison to control cells in  
161 proliferating and differentiating conditions, respectively (Figure 2B). Among 232 genes  
162 upregulated during differentiation in the tKO cells are several involved in retinoic acid  
163 regulation (from the top 10: *Aldh1a1*, *Aldh1a7*, *Brinp3* and *Tceal5*), which was previously  
164 described as important factor for myogenesis (El Haddad et al., 2017; Halevy and  
165 Lerman, 1993; Lamarche et al., 2015). Aldehyde dehydrogenases (*Aldh*) are also known  
166 to have promyogenic potential (Jean et al., 2011; Vauchez et al., 2009; Vella et al.,  
167 2011).

168 Gene Ontology (GO) analysis of differentiating triple KO clones reveals  
169 downregulation of genes involved in skeletal and cardiac muscle development pathways  
170 (Figure 2C). GO also shows that genes involved in mitochondria biogenesis and function  
171 are induced during differentiation of WT control cells, but not in the tKO cells (Figure  
172 S2A, B). The latter is supported by Gene Set Enrichment Analysis (GSEA), which shows  
173 only one significant category – an enrichment of genes related to oxidative  
174 phosphorylation among the genes downregulated in differentiated tKO cells vs.  
175 differentiated control cells (Figure 2D).

176 To assess whether tKO perturbed the mitochondrial metabolism of C2C12 cells,  
177 we analyzed oxygen consumption rate (OCR) as a measure of aerobic respiration using



178 the Seahorse Bioscience XF24. The tKO clones had a lower OCR even at baseline than  
179 the control cells in differentiation conditions (Figure 2E). Furthermore, treatment of these  
180 clones with the mitochondrial uncoupling agent BAM15, which produces maximal  
181 oxygen consumption, revealed an even greater difference in OCR between control and  
182 tKO clones (Figure 2F). These results suggest that these three microRNA are required  
183 to maintain mitochondrial respiratory capacity, and are consistent with the findings from  
184 *miR-1a*<sup>-/-</sup>*133a*<sup>-/-</sup> skeletal muscle specific double KO animals that showed impairment of  
185 mitochondrial function (Wüst et al., 2018). Thus, although the tKO C2C12 clones  
186 differentiate, their differentiation is slightly impaired compared to the WT cells and the  
187 cells suffer a downregulation of mitochondria function.

188  
189 *miR-206 and miR-1a targets are specifically upregulated during differentiation of triple*  
190 *KO C2C12 cells*

191  
192 The absence of *miR-206* and *miR-1a* could be compensated by some other  
193 mechanism, in which case the targets of *miR-206* and *miR-1a* will be unchanged in the  
194 tKO cells. We therefore analyzed the expression levels of the target mRNAs of these  
195 microRNAs (as specified in TargetScan 7.1; Table S2) in comparison to all other genes.  
196 The Cumulative Distribution Function (CDF) plots show that these targets are not  
197 changed in proliferation condition, when the three microRNA are not elevated (Figure  
198 3A), however they are specifically upregulated in the tKO cells during differentiation,  
199 when the three microRNAs are normally induced (Figure 3B). When the ratio of target :  
200 non-target genes were examined in bins of genes distributed from the most-repressed to  
201 most-induced in the tKO, the targets were not enriched in any bin in proliferating

202 myoblasts, but were enriched in the bins with induced genes under differentiating  
203 condition (bottom plots in Figure 3A and 3B). Thus, the shift for *miR-206/-1a* targets to  
204 the right in the CDF plot is due to the upregulation of the target genes in differentiating  
205 cells (Figure 3B). Therefore, in tKO C2C12 cells the microRNA targets are de-repressed,  
206 suggesting that an unknown regulatory mechanism has not been brought into effect to  
207 substitute for the missing microRNAs.

208 To address the hypothesis that other miRNAs could be upregulated in triple KO  
209 cells to compensate for the lack of *miR-206/-1a* we performed small RNA-seq in the tKO  
210 C2C12 cells. We detect 13 up- and 11 downregulated miRNAs in proliferating tKO cells  
211 in comparison to control cells (Figure 3C, S3A, B), and 3 up- and 1 downregulated  
212 miRNAs in differentiated tKO in comparison to control cells (Figure 3C, S3C).  
213 Nevertheless, the differentially expressed (particularly induced) miRNAs in tKO  
214 differentiating cells do not share seed sequence homology with *miR-206/-1a*, and as  
215 shown in Figure 3B, do not repress the *miR-206/-1a* targets. Thus it is unlikely that  
216 changes in other microRNAs in the tKO cells repress *miR-206/1* targets to compensate  
217 for the lack of the latter. We also found the variable change of the linked miR-133 gene  
218 product (2-4 fold increase or decrease) which does not meet the FDR < 0.1 threshold  
219 (Table S3).

220

221 *Lack of miR-206, miR-1a-1 and miR-1a-2 leads to partial embryonic lethality*

222

223 In order to generate triple KO animals, we first bred single KO of *miR-206*, *miR-*  
224 *1a-1* or *miR-1a-2*, and then their double heterozygous offspring to obtain double KO  
225 animals (Figure 4A). Next, we crossed double KO of *miR-206* and *miR-1a-1* animals

226 with double KO of *miR-206* and *miR-1a-2* animals, and subsequently their offspring  
227 (*miR-206* KO *miR-1a-1* HET *miR-1a-2* HET) (Figure 4A). The genotypes were confirmed  
228 by PCR. Out of 127 genotyped animals we obtained 2 triple KO males. The expected  
229 probability of tKO mice was 6.25% and the observed one was 1.57% (Figure 4B), which  
230 means the lack of these three miRNAs leads to partial embryonic lethality. This partial  
231 embryonic lethality is probably due to the absence of *miR-1a* in the heart, based on  
232 previously reported lethality of *miR-1a-1 miR-1a-2* double KO animals (Heidersbach et  
233 al., 2013; Wystub et al., 2013) and the embryonic lethality we observe for *miR-1a-1* and  
234 *miR-1a-2* double KO animals. Lack of *miR-206* and *miR-1a* expression in the skeletal  
235 muscle of the tKO animals was confirmed by q-RT-PCR (Figure 4C).

236

237 *Adult triple KO animals have worse physical performance than control mice*

238

239 Adult triple KO (tKO) mice had the same body weight as the control mice (Figure  
240 4D). To test skeletal muscle function of the tKO animals we measured their grip strength  
241 in comparison to control, single KO and double KO mice. Even though the weights of the  
242 animals are very similar, there are differences in the force generated. The triple KO mice are  
243 the weakest animals and this difference is significant in comparison to control, all single  
244 KO mice and *miR-206 miR-1a-2* double KO animals (Figure 4E). *miR-206 miR-1a-1* double  
245 KO and *miR-206 miR-1a-2* double KO were also significantly weaker than control  
246 animals (Figure 4E). The Rotarod experiments reveals that the tKO animals fall off the  
247 rotarod at an earlier acceleration than the other animal groups. They not only perform  
248 significantly worse in this test than control and all single KO animals, but also do not  
249 improve between Day 2 and Day 3 as do the other animals (Figure 4F). The tKO mice

250 also have the lowest maximal speed on the third day of experiment of all animals tested  
251 (Figure 4G). The progressive decrease in performance from the single KO animals to  
252 the double KO animals and further decrease in the triple KO animals confirms that the  
253 three microRNAs do compensate for each other and are functionally redundant in  
254 skeletal muscle.

255

256

257 *Skeletal muscles and hearts of triple KO animals reveal morphological abnormalities*

258

259 Even though the quadriceps size is very similar in all experimental mice (Figure  
260 5A), the H&E staining shows that the average fiber cross-sectional area in the tKO  
261 animals lacking *miR-206* and *miR-1a* is significantly smaller than in wild type mice  
262 (Figure 5B, 5C). Based on previous literature report (Wüst et al., 2018) we decided to  
263 check the mitochondria content and organization in muscle fibers. Staining with anti-  
264 mitochondria antibody (Figure 5D) does not reveal any differences in fiber type content  
265 (Figure 5E). We also did not see a change in number of nuclei visible per fiber cross-  
266 section (Figure 5F). Moreover, we do not observe mitochondrial aggregates in the center  
267 of fibers or granulate-like patterns in tKO skeletal muscle fibers, phenotypes that were  
268 seen in *miR-1a-133a* knockouts (Wüst et al., 2018). The size of heart in the triple KO  
269 animals is comparable to that in wild type (Figure S4A). Masson's trichrome staining  
270 shows accumulation of fibrotic tissue in tKO, but not *miR-206 miR-1a-1* dKO or *miR-206*  
271 *miR-1a-2* dKO hearts (Figure S4B).

## 272 Discussion

273 Over the last decade many studies showed that myomiRs are important for  
274 muscle development and function (Callis et al., 2007; McCarthy, 2011; Townley-Tilson et  
275 al., 2010). *miR-206*, *miR-1a-1* and *miR-1a-2* are genes encoding mature *miR-206* and  
276 *miR-1a*, muscle specific miRNAs (myomiRs), which not only have identical seed  
277 sequence, suggesting functional redundancy, but also are highly expressed in cardiac  
278 and skeletal muscle along with *miR-133a* and *miR-133b*. *miR206*, *miR-1a-1* and *miR-1a-*  
279 *2* were suggested to be a critical factor for skeletal muscle differentiation (Anderson et  
280 al., 2006; Chen et al., 2006; Chen et al., 2010; Dey et al., 2011; Gagan et al., 2012;  
281 Goljanek-Whysall et al., 2012; Heidersbach et al., 2013; Hirai et al., 2010; Kim et al.,  
282 2006; Koutsoulidou et al., 2011; Kwon et al., 2005; Mishima et al., 2009; Rao et al.,  
283 2006; Sokol and Ambros, 2005; Sweetman et al., 2008; Vergara et al., 2018; Wystub et  
284 al., 2013; Wüst et al., 2018; Yuasa et al., 2008; Zhao et al., 2007; Zhao et al., 2005).  
285 However, there was no model where all three microRNA genes are knocked out to prove  
286 the essentiality of these myomiRs in myogenesis.

287 Our study argues against an essential role of *miR-206*, *miR-1a-1* and *miR-1a-2* in  
288 skeletal muscle differentiation, but supports their functional importance in optimal  
289 skeletal muscle differentiation and performance. C2C12 myoblasts lacking *miR-206*,  
290 *miR-1a-1* and *miR-1a-2* are still able to differentiate, producing promyogenic mRNAs  
291 and proteins, and forming normal myotubes. These findings are true both for PAX7  
292 negative and PAX7 positive murine myoblasts. Although differentiation was observed, in  
293 our RNA-seq there was a decrease in expression of genes in mitochondria- and skeletal  
294 muscle - related pathways in the triple KO C2C12 clones' during differentiation. RNA-  
295 seq based screens revealed that the targets of these microRNAs remain de-repressed.

296 Thus the simultaneous knockout of the three microRNAs has the expected de-  
297 reposition of target genes and yet they are not essential for myogenesis. Loss of *miR-*  
298 *1a/-133a* leads to induction of *Mef2a* expression and further induction of *Dlk1-Dio3*  
299 mega gene cluster(Wüst et al., 2018). In our *miR-206 miR-1a-1 miR-1a-2* triple KO  
300 model despite the decrease of *miR-1a*, *Mef2a* level is not changed in comparison to  
301 control cells, and the *Dlk1-Dio3* gene cluster miRNA are not induced. This suggests that  
302 the changes seen in Wüst et al. (2018) must be due to the loss of *miR-133a*.

303 *miR-1* was previously reported as a mitochondrial translation enhancer during  
304 muscle differentiation (Zhang et al., 2014). It enters the mitochondria and together with  
305 Ago2 but not GW182 stimulates the translation of specific mitochondrial genome-  
306 encoded transcripts. The triple KO C2C12 cells show a decrease in the maximal oxygen  
307 consumption rate suggesting mitochondrial dysfunction. The mitochondrial respiratory  
308 capacity in tKO C2C12 clones is significantly lower than in control C2C12 myoblasts and  
309 myotubes. Interestingly, Wüst et al. (Wüst et al., 2018) observed mitochondrial  
310 aggregation and accumulation in the skeletal muscle fibers of *miR-1a/-133a Pax7<sup>+</sup>-Cre*  
311 mice, whereas we do not see changes in mitochondria structure or localization in our  
312 triple KO cells/muscles, suggesting that this phenotype may be caused by lack of *miR-*  
313 *133a*. Therefore, the *miR-206* family (in this report) and *miR-133a* (Wüst et al., 2018) are  
314 independently required for normal mitochondrial function.

315 An *in vivo* model was generated by breeding single knockout animals in order to  
316 obtain animals lacking two or three miRNA genes. We obtained *miR-206 miR-1a-1* and  
317 *miR-206 miR-1a-2* double knockout animals with ratios similar to expected Mendelian  
318 ratios. *miR-1a-1 miR-1a-2* dKO animals were embryonically lethal, most likely due to an  
319 essential function of these microRNAs in cardiac differentiation, as published previously

320 (Heidersbach et al., 2013; Wystub et al., 2013). Unexpectedly, we successfully  
321 generated triple knockout animals, clearly showing that these miRNAs are collectively  
322 not essential for skeletal muscle formation. We still observe the partial embryonic  
323 lethality in the triple KO, but we hypothesize that tKO could be generated in a mixed  
324 genetic background, which may decrease embryonic lethality, as reported for miR-1a-1  
325 single KO animals by Heidersbach (2013). We hypothesize the triple KO males were  
326 infertile as even though breeding was observed, none of the females got pregnant.  
327 Interestingly, the mice lacking *miR-206*, *miR-1a-1* and *miR-1a-2* had worse physical  
328 performance than wild type, single miRNA knockout and double miRNAs knockout  
329 animals. The triple KO mice have weaker muscles and perform worse at rotarod test  
330 than wild type control animals. Although the rotarod results may be affected by cardiac  
331 defects of KO animals, the decrease in grip strength and decrease in skeletal myofiber  
332 diameter clearly show that skeletal muscle function is impaired. Taken together, these  
333 findings emphasize that even though *miR-206*, *miR-1a-1* and *miR-1a-2* are not essential  
334 for the skeletal muscle formation, they are required for maintenance of its full physical  
335 capability. We also found that *miR-206* KO or *miR-1a-2* KO animals perform worse than  
336 WT mice in rotarod test, which, to our knowledge, is the first demonstration that even  
337 single microRNA gene deletion decreases the neuromuscular performance. This effect  
338 increases with each additional microRNA gene deletion.

339 Extensive cooperation between several miRNAs, mRNAs and proteins leads to  
340 effective differentiation. Our study shows that lack of three specific myomiRs *miR-206*,  
341 *miR-1a-1* and *miR-1a-2* does not prevent myogenesis, but may lead to functional  
342 impairment of skeletal muscles, emphasizing the complex and non-binary nature of  
343 skeletal muscle differentiation. Combinatorial knockout of additional known myomiRs

344 may be necessary to fully answer the question if any of these miRNAs are essential for  
345 myogenesis. Moreover, this study underscores the importance of joint *in vitro* and *in vivo*  
346 full knockout studies by showing that even small alterations in differentiation at the  
347 cellular level, may have a significant impact on physical activity with the adult skeletal  
348 muscle.

349         There is an interesting comparison to be made between the functional  
350 redundancy of the three myomiRs studied here and of the *MyoD*, *Myf5* and *Mrf4*  
351 transcription factor family. Just as overexpression of *miR-206* pushes myoblasts towards  
352 differentiation (Kim et al., 2006), overexpression of *Myod1* induces myogenic conversion  
353 of fibroblasts (Lattanzi et al., 1998; Tapscott et al., 1988) and ectopic *Myod1* expression  
354 drives terminal differentiation of pluripotent stem cells into skeletal myotubes upon  
355 chemical treatment (Genovese et al., 2017). *Myod1* knockout *in vitro* inhibits the  
356 myoblast differentiation completely (Cichewicz et al., 2018), but *in vivo* *Myod1* knockout  
357 mice develop normal skeletal muscles (Rudnicki et al., 1992). In a similar vein, knockout  
358 of individual microRNA genes, *miR-206*, *miR-1a-1* or *miR1a-2*, did not interfere with  
359 differentiation *in vivo* (Heidersbach et al., 2013; Williams et al., 2009; Wystub et al.,  
360 2013; Zhao et al., 2007), but affected the regeneration of skeletal muscle after acute or  
361 chronic injury (Liu et al., 2012; Williams et al., 2009). However, *Myod1* is dispensable for  
362 skeletal muscle development in mice because of the functional redundancy between  
363 *Myod1* and *Myf5*, so that mice with double knockout of the two genes do not show  
364 skeletal myogenesis (Rudnicki et al., 1993). In a different *Myod1* and *Myf5* double KO  
365 model, where *Mrf4* expression was not compromised, the embryonic myogenesis was  
366 rescued (Kassar-Duchossoy et al., 2004). Thus the myogenic transcription factors are  
367 essential for differentiation, with the essentiality masked by redundancy in actions of the



368 three related transcription factors. This is not the case for the three microRNA genes,  
369 where even after removal of all three functionally redundant genes, skeletal muscle  
370 differentiation still occurs *in vitro* and *in vivo*: the three microRNAs studied here are not  
371 essential for differentiation.

372 However, the three microRNAs are clearly important for optimal skeletal muscle  
373 differentiation, judging by the defects in mitochondrial function, myofiber diameters and  
374 skeletal muscle performance that we report in this paper. We also demonstrate that it is  
375 possible to genetically separate the functional role of miRNAs coming from bicistronic  
376 loci like *miR-1a* and *miR-133a* and to genetically examine functional redundancy of as  
377 many as three microRNAs *miR-206*, *miR-1a-1* and *miR-1a-2*.

378

379

## 380 **Material and Methods**

381

### 382 *Cell lines generation*

#### 383 Stable overexpression of inducible Cas9 in C2C12 cells

384 pCW-Cas9 (addgene #50661) vector was packed in the virus using psPAX2 (addgene  
385 #12260) and pMD2.G (addgene #12259) in 293T cells. C2C12 cells were transduced  
386 with the filtered supernatant containing virus. After 24 hours cells were treated with  
387 puromycin (C=2ug/ml; Sigma, Cat# P9620) and resistant cells were seeded to 96-well  
388 plates using single cell dilution method. Growing clones were examined for Cas9  
389 expression by immunoblotting after treatment with doxycycline (C=1ug/ml; Sigma,  
390 Cat# D9891) for 48h. Clones with high expression upon induction and low leakage level  
391 without doxycycline were next tested for differentiation efficiency by q-RT-PCR for

392 *Myod1*, *Myogenin* and *Myh3*, and immunoblotting for MYOD1, MYOGENIN and MHC.  
393 The clone, which was the most similar to wild-type cells, was chosen for further  
394 experiments.

#### 395 Knockout cell line generation

396 CRISPR protocol (Ran et al., 2013) with minor changes was followed to achieve deletion  
397 of *miR-206*, *miR-1a-1* and *miR-1a-2* genes. Briefly, sgRNAs were designed using  
398 CRISPR DESIGN tool: <http://crispr.mit.edu/>. Cas9 expression in C2C12 cells was  
399 induced 24h before sgRNAs transfection using doxycycline (C=1ug/ml). Cells were co-  
400 transfected with 6 different sgRNAs cloned into gRNA\_GFP-T2 (addgene #41820), and  
401 a spiking vector coding for a resistance gene using Lipofectamine 3000 (Life  
402 Technologies, Cat# L3000015). After 24-48 hours cells were treated with hygromycin  
403 (C=300ug/ml; Life technologies, Cat# 10687-010), and resistant cells were seeded to  
404 96-well plates using single cell dilution method. Growing clones were examined for  
405 desired deletion by PCR on extracted genomic DNA (Quick Extract DNA Extraction  
406 Solution, Lucigen., Cat# QE09050), and candidates with complete loss of all three WT  
407 PCR products (homozygous deletions) were confirmed by Sanger sequencing and q-  
408 RT-PCR for *miR-206*, *miR-1a-1* and *miR-1a-2*. Oligonucleotides sequences are listed in  
409 Table S1.

410

#### 411 *Cell culture, differentiation assay*

412 C2C12 cells were cultured in DMEM-high glucose medium (GE Healthcare Life  
413 Sciences co., Cat# SH30022.FS) with 10% FBS (Gibco, Cat# 10437-028), when  
414 differentiating, serum was switched to 2% horse serum (GE Healthcare Life Sciences  
415 co., Cat# SH30074.03) supplemented with (1) 1x ITS (Insulin-Transferrin-Selenium;

416 Fisher, Cat# 41400045) and 5mM LiCl (Sigma; Cat# 203637) for PAX7 negative cells or  
417 (2) 1x ITS for PAX7 positive cells. PAX7 negative and positive cell lines were  
418 independently purchased.

419

#### 420 *RNA isolation and RT-PCR*

421 RNA was isolated by TRIzol reagent (Life Technologies, Cat# 15596018) using Direct-  
422 zol RNA MiniPrep Plus Kit including DNase treatment (Zymo Research, Cat# R2052).  
423 cDNA synthesis for mRNA expression levels measurement was performed using  
424 Superscript III RT cDNA synthesis kit (Life Technologies co., Cat# 18080-051) with  
425 random hexamer and oligodT priming. After cDNA synthesis, qPCR was performed with  
426 Applied Biosystems 7500 Real-Time PCR Systems using SensiFAST™ SYBR® Hi-ROX  
427 Kit (BIOLINE, Cat# BIO-92020). miScript II RT (Qiagen, Cat# 218161) and miScript  
428 SYBR® Green PCR kits (Qiagen, Cat# 218075) were used for miRNA and pre-miRNA  
429 expression levels measurement. All primers used in this study are listed in Table S1.

430

#### 431 *Western blotting*

432 Cells were lysed in IPH buffer (50mM Tris-Cl, 0.5% NP-40%, 50mM EDTA) and run on  
433 10% polyacrylamide SDS-PAGE gel, transferred to nitrocellulose membranes.  
434 Membranes were blocked for 30 minutes in 5% milk containing PBST, and incubated  
435 overnight with primary antibody in 1% milk. Secondary antibody incubation was carried  
436 out for 1 hour after washing, and at 1:4000 dilution before washing and incubation with  
437 Millipore Immobilon HRP substrate. Primary antibodies were used as follows: mouse  
438 monoclonal MyoD (5.8A) (Santa Cruz co., Cat# sc-32758), mouse monoclonal Myogenin  
439 (F5D) (Santa Cruz co., Cat# sc-12732), rabbit polyclonal MYH3 (Proteintech, Cat#

440 22287-1-AP), mouse monoclonal HSP90  $\alpha/\beta$  (F-8) (Santa Cruz co., Cat# sc-13119).  
441 Secondary antibodies were used as follows: anti-rabbit IgG, HRP-linked Antibody (Cell  
442 Signaling, Cat# 7074S), anti-mouse IgG, HRP-linked Antibody (Cell Signaling, Cat#  
443 7076S).

444  
445 *Immunofluorescence assay*

446 Cells were plated on glass coverslips and collected in growth medium or after 5 days of  
447 differentiation. The coverslips were fixed with 4% paraformaldehyde in PBS for 15 min,  
448 permeabilized in 0.5% Triton X-100 in PBS, and blocked in 5% goat serum. The  
449 coverslips were incubated with primary rabbit polyclonal antibody MYH3 (Proteintech,  
450 Cat# 22287-1-AP) overnight at 4°C and then with goat anti-Rabbit IgG (H+L) Cross-  
451 Adsorbed Secondary Antibody, Alexa Fluor 647 (Invitrogen, Cat# A-21244) for 1 h. Cells  
452 were stained with Hoechst 33342 (1  $\mu\text{g}/\text{mL}$ ; Life Technologies, Cat# H3570) for 2  
453 minutes at room temperature, washed and then mounted with ProLong™ Gold Antifade  
454 Mountant (Life Technologies, Cat# P10144). The primary and secondary antibodies  
455 were diluted 1:400 and 1:1000, respectively. The fusion index was calculated by dividing  
456 the number of nuclei contained within multinucleated cells by the number of total nuclei  
457 in a field. Microscopy was performed using the Zeiss LSM 710 Confocal Microcopy and  
458 ImageJ Software for analysis (Schneider et al., 2012).

459  
460 *Mitochondrial Stress Test*

461 Oxygen Consumption Rate (OCR) for Mitochondrial Stress Test (MST) assay was  
462 measured using Seahorse XF24 Extracellular Flux Analyzer (Agilent). 20,000 cells per  
463 well were plated in growth medium in at least triplicate for each cell line and condition

464 48h before test. For DM1, 24h post seeding medium was switched to differentiation and  
465 MST assay was performed after 24h. One hour before MST assay medium was  
466 changed to MST medium (unbuffered, serum-free DMEM pH 7.4; Life Technologies,  
467 Cat# 12100046). For the MST assay, oligomycin (inhibits ATP synthase; Sigma, Cat#  
468 75351), BAM15 (protonophore uncoupler, stimulates a maximum rate of mitochondrial  
469 respiration; Cayman, Cat# 17811), and Rotenone and Antimycin A (inhibits the transfer  
470 of electrons in complex I and III, respectively; Sigma, Cat# R8875, Cat# A8674) were  
471 injected to a final concentration of 2 $\mu$ M, 10 $\mu$ M, 1 $\mu$ M and 2 $\mu$ M, respectively over a 100-  
472 minute time course. At the end of each experiment, each assay was normalized to total  
473 protein count measured from a sister plate that was seeded concurrently with the  
474 experimental plate.

475

#### 476 *RNA-seq*

477 RNA samples were isolated from proliferating or differentiating WT and tKO cells as  
478 described above. RNA-seq was performed by Beijing Novogene Co., Ltd. on poly(A)  
479 enriched RNA using the Illumina HiSeq instrument. We obtained >50 million paired-end  
480 150 bp long reads for all conditions. RNA-Seq data was aligned to the reference  
481 genome - mouse assembly GRCm38/mm10 using STAR v2.5 (Dobin et al., 2013) and  
482 quantified by HTSeq 0.6.1p1 (Python 2.7.5) (Anders et al., 2015). DESeq2 R package  
483 (Love et al., 2014) was then applied to determine differentially expressed genes with a  
484 significant criterion  $p_{adj} < 0.05$ . Gene Ontology was performed using clusterProfiler (Yu  
485 et al., 2012). GSEA (Subramanian et al., 2005) was used for gene set enrichment  
486 analysis. The list of *miR-206/-1a* targets was downloaded from TargetScan 7.1 (Agarwal

487 et al., 2015). All RNA-Seq libraries data files are available under GEO accession  
488 number: GSE133260.

489

#### 490 *Short RNA-seq*

491 RNA samples were isolated from proliferating or differentiating WT and tKO cells as  
492 described above. 0.5 ug of RNA was used for short RNA-seq library preparation with  
493 NEBNext Small RNA library kit (New England Biolabs, Cat# E7300). Shortly, 3'  
494 preadenylated adaptors and then 5' adaptors were ligated to RNA, followed by reverse  
495 transcription and PCR with indexes. Next, 8% TBE-PAGE gel was used for size  
496 selection (15-50nt). For sequencing we used Illumina NextSeq 500 sequencer with high-  
497 output, 75-cycles single-end mode at Genome Analysis and Technology Core (GATC) of  
498 University of Virginia, School of Medicine. Data trimmed by catadapt v1.15 (Python  
499 2.7.5) (Martin, 2011) was aligned to the reference genome (gencode GRCm38.p5  
500 Release M16, primary assembly) using STAR v2.5 with settings based on previous  
501 paper (Faridani et al., 2016) and the total number of mapped reads were used for  
502 normalization. In general, mapped percentage is more than 95%. Unitas v.1.5.1 (with  
503 SeqMap v1.0.13) (Gebert et al., 2017; Jiang and Wong, 2008) was used for miRNA  
504 abundance quantification with setting `-species_miR_only -species mus_musculus` to  
505 map the reads to mouse sequence of miRBase Release 22 (Kozomara et al., 2019).  
506 This setting (equivalent to `-tail 2 -intmod 1 -mismatch 1 -insdel 0`) will allow 2 non-  
507 templated 3' nucleotides and 1 internal mismatch for miRNA mapping. For differential  
508 analysis, DESeq2 (Love et al., 2014) was used on count matrix of mature microRNAs.  
509 All short RNA-Seq libraries data files are available under GEO accession number:  
510 GSE133255.

511

## 512 *Mice*

513 Mouse strains used in the study were obtained as follows: *miR-206* KO mice provided by  
514 Eric Olson (Williams et al., 2009); *miR-1a-1* and *miR-1a-2* KO mice provided by Deepak  
515 Srivastava (Heidersbach et al., 2013; Zhao et al., 2007). Double KO mice were  
516 generated by crossing single KO animals and then crossing their double heterozygous  
517 offspring. Triple KO mice were generated by crossing *miR-206 miR-1a-1* double KO  
518 animals with *miR-206 miR-1a-2* double KO animals and then crossing their offspring  
519 (*miR-206* KO *miR-1a-1* HET *miR-1a-2* HET) as shown in Figure 4A. All animals were  
520 PCR-genotyped using gene-specific primers listed in Table S1. Work involving mice  
521 adhered to the guidelines of the University of Virginia Institutional Animal Care and Use  
522 Committee (IACUC), protocol number 3774.

523

## 524 *Physical endurance tests*

525 Tests described below were performed on 12 weeks old mice, males and females (7+6)  
526 for all animals except tKO mice, where 2 males were examined.

### 527 Grip strength test

528 Mice were tested for their maximal grip strength with a grip strength meter (C.S.C. Force  
529 Measurement, Inc. AMETEK 2LBF Chatillon). The mice were placed on the force meter  
530 allowing forelimb to grip the grid. The mice were then slowly dragged backward until loss  
531 of grip. The bodies of the mice were kept in a horizontal position during the test. Three  
532 trials were repeated in 1-minute intervals. The average of the three trials was recorded  
533 as the maximum grip strength.

### 534 Accelerating rotarod test

535 Motor coordination and balance were assessed on an Economex accelerating rotarod  
536 (Columbus Instruments) that has the capacity to test five mice simultaneously. The  
537 testing procedure consists of three days, two runs on each day. The rod was adjusted to  
538 spin at a beginning speed of 4.0 r.p.m with an acceleration (0.12 r.p.m.) over 300s to  
539 final speed 40.0rpm. The maximum running time was 360s. Latency to fall from the  
540 rotarod and maximum animal speed for each run were recorded and averaged per each  
541 day.

542 Experiments involving mice adhered to the guidelines of the University of Virginia  
543 Institutional Animal Care and Use Committee (IACUC), protocol number 4064.

544

#### 545 *Muscle isolation, histological analyses and staining*

546 The mice were sacrificed by carbon dioxide inhalation. The hearts, quadriceps and  
547 tibialis anterior muscles were dissected quickly, weighed, fixed with 4%  
548 paraformaldehyde or snap-frozen in liquid nitrogen and stored at  $-80^{\circ}\text{C}$ . All samples  
549 were collected at least 7 days after assessment of physical function from 3 males and 2  
550 females for all animals except tKO mice (2 males)

551 All formalin-fixed paraffin-embedded (FFPE) sections, H&E staining and Masson's  
552 trichrome staining were performed by Research Histology Core at University of Virginia  
553 (Charlottesville, USA). Fiber size was measured on H&E stained quadriceps muscles  
554 using ImageJ 1.50i (Java 1.6.0\_24) (Schneider et al., 2012) on three pictures from two  
555 animals per genotype (300 fibers per genotype in total).

556 Immunofluorescence on FFPE sections was performed as previously described (Wang  
557 et al., 2014). In short, FFPE sections were deparaffinized and antigen-retrieved (by  
558 Biorepository & Tissue Research Facility at University of Virginia), washed, and blocked



559 then incubated with anti-mitochondria antibody, clone 113-1, Cy3 conjugate (EMD  
560 Millipore, Cat# MAB1273C3) overnight. Slides were incubated with CuSO<sub>4</sub> to reduce  
561 autofluorescence and mounted with Prolong Gold antifade reagent with DAPI. Images  
562 were taken with a Zeiss LSM 710 Multiphoton microscope with a 20x (NA 0.8) objective.  
563 Mitochondria content and nuclei per fiber count was performed using ImageJ 1.50i (Java  
564 1.6.0\_24) (Schneider et al., 2012) on ten pictures per genotype (600 fibers per genotype  
565 in total).

566

567

## 568 **Acknowledgments**

569 We thank all members of the Dutta lab for helpful discussion, especially Dr. Etsuko  
570 Shibata for technical guidance regarding CRISPR/Cas9 method. We thank Research  
571 Histology Core, Genome Analysis and Technology Core, and Biorepository & Tissue  
572 Research Facility at University of Virginia (Charlottesville, USA). We thank Scott Zeitlin  
573 and Elise Braatz for help with grip strength measurement, and Ashley Bolte for help with  
574 rotarod experiment. This work was supported by a grant from the NIH (RO1 AR067712)  
575 (AD). RKP was supported by a Predoctoral Fellowship from the American Heart  
576 Association (18PRE33990261). The authors declare no competing financial interests.

577

## 578 **Author Contributions**

579 RKP and AD designed all experiments. RKP obtained all C2C12 cell lines and mice  
580 strains used in this study. RKP and ES confirmed deletions in KO clones. RKP and ES  
581 performed differentiation assays, qPCR and Western Blot analyses for C2C12 cells. ES  
582 performed immunofluorescence experiments. RKP prepared samples for RNA-seq and

583 short RNA-seq experiments. ZS performed and analyzed short RNA-seq experiment.  
584 RKP crossed and genotyped all animals with help of KJ. Physical endurance  
585 experiments were performed by RKP. Muscle isolation was done by RKP with help of  
586 PP and KJ. SN performed Seahorse assay with help of RKP. JK performed anti-  
587 mitochondria staining. JL helped with mice study design and DK with mitochondria-  
588 related study design. RKP and AD wrote the manuscript.

589

590

591

## 592 **References**

593 Agarwal, V., Bell, G.W., Nam, J.W., and Bartel, D.P. (2015). Predicting effective  
594 microRNA target sites in mammalian mRNAs. *Elife* 4.

595 Anders, S., Pyl, P.T., and Huber, W. (2015). HTSeq--a Python framework to work with  
596 high-throughput sequencing data. *Bioinformatics* 31, 166-169.

597 Anderson, C., Catoe, H., and Werner, R. (2006). MIR-206 regulates connexin43  
598 expression during skeletal muscle development. *Nucleic Acids Res* 34, 5863-5871.

599 Bhinge, A., Namboori, S.C., Bithell, A., Soldati, C., Buckley, N.J., and Stanton, L.W.  
600 (2016). MiR-375 is Essential for Human Spinal Motor Neuron Development and May Be  
601 Involved in Motor Neuron Degeneration. *Stem Cells* 34, 124-134.

602 Callis, T.E., Chen, J.F., and Wang, D.Z. (2007). MicroRNAs in skeletal and cardiac  
603 muscle development. *DNA Cell Biol* 26, 219-225.

604 Chargé, S.B., and Rudnicki, M.A. (2004). Cellular and molecular regulation of muscle  
605 regeneration. *Physiol Rev* 84, 209-238.

606 Chen, C.Z., Li, L., Lodish, H.F., and Bartel, D.P. (2004). MicroRNAs modulate  
607 hematopoietic lineage differentiation. *Science* 303, 83-86.

608 Chen, J.F., Mandel, E.M., Thomson, J.M., Wu, Q., Callis, T.E., Hammond, S.M., Conlon,  
609 F.L., and Wang, D.Z. (2006). The role of microRNA-1 and microRNA-133 in skeletal  
610 muscle proliferation and differentiation. *Nat Genet* 38, 228-233.

611 Chen, J.F., Tao, Y., Li, J., Deng, Z., Yan, Z., Xiao, X., and Wang, D.Z. (2010).  
612 microRNA-1 and microRNA-206 regulate skeletal muscle satellite cell proliferation and  
613 differentiation by repressing Pax7. *J Cell Biol* 190, 867-879.

614 Cheung, T.H., and Rando, T.A. (2013). Molecular regulation of stem cell quiescence.  
615 *Nat Rev Mol Cell Biol* 14, 329-340.

616 Choi, W.Y., Giraldez, A.J., and Schier, A.F. (2007). Target protectors reveal dampening  
617 and balancing of Nodal agonist and antagonist by miR-430. *Science* 318, 271-274.

618 Cichewicz, M.A., Kiran, M., Przanowska, R.K., Sobierajska, E., Shibata, Y., and Dutta,  
619 A. (2018). MUNC, an Enhancer RNA Upstream from the. *Mol Cell Biol* 38.

620 Cordes, K.R., Sheehy, N.T., White, M.P., Berry, E.C., Morton, S.U., Muth, A.N., Lee,  
621 T.H., Miano, J.M., Ivey, K.N., and Srivastava, D. (2009). miR-145 and miR-143 regulate  
622 smooth muscle cell fate and plasticity. *Nature* 460, 705-710.

623 Delaloy, C., Liu, L., Lee, J.A., Su, H., Shen, F., Yang, G.Y., Young, W.L., Ivey, K.N., and  
624 Gao, F.B. (2010). MicroRNA-9 coordinates proliferation and migration of human  
625 embryonic stem cell-derived neural progenitors. *Cell Stem Cell* 6, 323-335.

626 Dey, B.K., Gagan, J., and Dutta, A. (2011). miR-206 and -486 induce myoblast  
627 differentiation by downregulating Pax7. *Mol Cell Biol* 31, 203-214.

628 Dey, B.K., Gagan, J., Yan, Z., and Dutta, A. (2012). miR-26a is required for skeletal  
629 muscle differentiation and regeneration in mice. *Genes Dev* 26, 2180-2191.

630 Dobin, A., Davis, C.A., Schlesinger, F., Drenkow, J., Zaleski, C., Jha, S., Batut, P.,  
631 Chaisson, M., and Gingeras, T.R. (2013). STAR: ultrafast universal RNA-seq aligner.  
632 *Bioinformatics* 29, 15-21.

633 Dore, L.C., Amigo, J.D., Dos Santos, C.O., Zhang, Z., Gai, X., Tobias, J.W., Yu, D.,  
634 Klein, A.M., Dorman, C., Wu, W., *et al.* (2008). A GATA-1-regulated microRNA locus  
635 essential for erythropoiesis. *Proc Natl Acad Sci U S A* 105, 3333-3338.

636 Dugas, J.C., Cuellar, T.L., Scholze, A., Ason, B., Ibrahim, A., Emery, B., Zamanian, J.L.,  
637 Foo, L.C., McManus, M.T., and Barres, B.A. (2010). Dicer1 and miR-219 Are required  
638 for normal oligodendrocyte differentiation and myelination. *Neuron* 65, 597-611.

639 El Haddad, M., Notarnicola, C., Evano, B., El Khatib, N., Blaquière, M., Bonnieu, A.,  
640 Tajbakhsh, S., Hugon, G., Vernus, B., Mercier, J., *et al.* (2017). Retinoic acid maintains  
641 human skeletal muscle progenitor cells in an immature state. *Cell Mol Life Sci* 74, 1923-  
642 1936.

643 Faridani, O.R., Abdullayev, I., Hagemann-Jensen, M., Schell, J.P., Lanner, F., and  
644 Sandberg, R. (2016). Single-cell sequencing of the small-RNA transcriptome. *Nat*  
645 *Biotechnol* 34, 1264-1266.

646 Friedman, L.M., Dror, A.A., Mor, E., Tenne, T., Toren, G., Satoh, T., Biesemeier, D.J.,  
647 Shomron, N., Fekete, D.M., Hornstein, E., *et al.* (2009). MicroRNAs are essential for  
648 development and function of inner ear hair cells in vertebrates. *Proc Natl Acad Sci U S A*  
649 106, 7915-7920.

650 Gagan, J., Dey, B.K., Layer, R., Yan, Z., and Dutta, A. (2012). Notch3 and Mef2c  
651 Proteins Are Mutually Antagonistic via Mkp1 Protein and miR-1/206 MicroRNAs in  
652 Differentiating Myoblasts. *J Biol Chem* 287, 40360-40370.

653 Garzon, R., and Croce, C.M. (2008). MicroRNAs in normal and malignant  
654 hematopoiesis. *Curr Opin Hematol* 15, 352-358.

655 Gebert, D., Hewel, C., and Rosenkranz, D. (2017). unitas: the universal tool for  
656 annotation of small RNAs. *BMC Genomics* 18, 644.

657 Genovese, N.J., Domeier, T.L., Telugu, B.P., and Roberts, R.M. (2017). Enhanced  
658 Development of Skeletal Myotubes from Porcine Induced Pluripotent Stem Cells. *Sci*  
659 *Rep* 7, 41833.

660 Goljanek-Whysall, K., Pais, H., Rathjen, T., Sweetman, D., Dalmay, T., and  
661 Münsterberg, A. (2012). Regulation of multiple target genes by miR-1 and miR-206 is  
662 pivotal for C2C12 myoblast differentiation. *J Cell Sci* 125, 3590-3600.

663 Halevy, O., and Lerman, O. (1993). Retinoic acid induces adult muscle cell  
664 differentiation mediated by the retinoic acid receptor-alpha. *J Cell Physiol* 154, 566-572.

665 Heidersbach, A., Saxby, C., Carver-Moore, K., Huang, Y., Ang, Y.S., de Jong, P.J., Ivey,  
666 K.N., and Srivastava, D. (2013). microRNA-1 regulates sarcomere formation and  
667 suppresses smooth muscle gene expression in the mammalian heart. *Elife* 2, e01323.

668 Hirai, H., Verma, M., Watanabe, S., Tastad, C., Asakura, Y., and Asakura, A. (2010).  
669 MyoD regulates apoptosis of myoblasts through microRNA-mediated down-regulation of  
670 Pax3. *J Cell Biol* 191, 347-365.

671 Jackson, S.J., Zhang, Z., Feng, D., Flagg, M., O'Loughlin, E., Wang, D., Stokes, N.,  
672 Fuchs, E., and Yi, R. (2013). Rapid and widespread suppression of self-renewal by  
673 microRNA-203 during epidermal differentiation. *Development* 140, 1882-1891.

674 Jean, E., Laoudj-Chenivesse, D., Notarnicola, C., Rouger, K., Serratrice, N., Bonnieu,  
675 A., Gay, S., Bacou, F., Duret, C., and Carnac, G. (2011). Aldehyde dehydrogenase  
676 activity promotes survival of human muscle precursor cells. *J Cell Mol Med* 15, 119-133.

677 Jiang, H., and Wong, W.H. (2008). SeqMap: mapping massive amount of  
678 oligonucleotides to the genome. *Bioinformatics* 24, 2395-2396.

679 Kassar-Duchossoy, L., Gayraud-Morel, B., Gomès, D., Rocancourt, D., Buckingham, M.,  
680 Shinin, V., and Tajbakhsh, S. (2004). Mrf4 determines skeletal muscle identity in  
681 Myf5:Myod double-mutant mice. *Nature* 431, 466-471.

682 Kim, H.K., Lee, Y.S., Sivaprasad, U., Malhotra, A., and Dutta, A. (2006). Muscle-specific  
683 microRNA miR-206 promotes muscle differentiation. *J Cell Biol* 174, 677-687.

684 Koutsoulidou, A., Mastrogiannopoulos, N.P., Furling, D., Uney, J.B., and Phylactou, L.A.  
685 (2011). Expression of miR-1, miR-133a, miR-133b and miR-206 increases during  
686 development of human skeletal muscle. *BMC Dev Biol* 11, 34.

687 Kozomara, A., Birgaoanu, M., and Griffiths-Jones, S. (2019). miRBase: from microRNA  
688 sequences to function. *Nucleic Acids Res* 47, D155-D162.

689 Krichevsky, A.M., Sonntag, K.C., Isacson, O., and Kosik, K.S. (2006). Specific  
690 microRNAs modulate embryonic stem cell-derived neurogenesis. *Stem Cells* 24, 857-  
691 864.

692 Kwon, C., Han, Z., Olson, E.N., and Srivastava, D. (2005). MicroRNA1 influences  
693 cardiac differentiation in *Drosophila* and regulates Notch signaling. *Proc Natl Acad Sci U*  
694 *S A* 102, 18986-18991.

695 Lamarche, É., Lala-Tabbert, N., Gunanayagam, A., St-Louis, C., and Wiper-Bergeron,  
696 N. (2015). Retinoic acid promotes myogenesis in myoblasts by antagonizing  
697 transforming growth factor-beta signaling via C/EBP $\beta$ . *Skelet Muscle* 5, 8.

698 Lattanzi, L., Salvatori, G., Coletta, M., Sonnino, C., Cusella De Angelis, M.G., Gioglio, L.,  
699 Murry, C.E., Kelly, R., Ferrari, G., Molinaro, M., *et al.* (1998). High efficiency myogenic  
700 conversion of human fibroblasts by adenoviral vector-mediated MyoD gene transfer. *An*

701 alternative strategy for ex vivo gene therapy of primary myopathies. *J Clin Invest* 101,  
702 2119-2128.

703 Li, H., Xie, H., Liu, W., Hu, R., Huang, B., Tan, Y.F., Xu, K., Sheng, Z.F., Zhou, H.D.,  
704 Wu, X.P., *et al.* (2009). A novel microRNA targeting HDAC5 regulates osteoblast  
705 differentiation in mice and contributes to primary osteoporosis in humans. *J Clin Invest*  
706 119, 3666-3677.

707 Li, Z., Hassan, M.Q., Volinia, S., van Wijnen, A.J., Stein, J.L., Croce, C.M., Lian, J.B.,  
708 and Stein, G.S. (2008). A microRNA signature for a BMP2-induced osteoblast lineage  
709 commitment program. *Proc Natl Acad Sci U S A* 105, 13906-13911.

710 Liu, N., Williams, A.H., Maxeiner, J.M., Bezprozvannaya, S., Shelton, J.M., Richardson,  
711 J.A., Bassel-Duby, R., and Olson, E.N. (2012). microRNA-206 promotes skeletal muscle  
712 regeneration and delays progression of Duchenne muscular dystrophy in mice. *J*  
713 *Clin Invest* 122, 2054-2065.

714 Love, M.I., Huber, W., and Anders, S. (2014). Moderated estimation of fold change and  
715 dispersion for RNA-seq data with DESeq2. *Genome Biol* 15, 550.

716 Martin, M. (2011). Cutadapt Removes Adapter Sequences From High-Throughput  
717 Sequencing Reads (*EMBnet.journal*), pp. 10-12.

718 Mauro, A. (1961). Satellite cell of skeletal muscle fibers. *J Biophys Biochem Cytol* 9,  
719 493-495.

720 McCarthy, J.J. (2011). The MyomiR network in skeletal muscle plasticity. *Exerc Sport*  
721 *Sci Rev* 39, 150-154.

722 Mishima, Y., Abreu-Goodger, C., Staton, A.A., Stahlhut, C., Shou, C., Cheng, C.,  
723 Gerstein, M., Enright, A.J., and Giraldez, A.J. (2009). Zebrafish miR-1 and miR-133

724 shape muscle gene expression and regulate sarcomeric actin organization. *Genes Dev*  
725 *23*, 619-632.

726 O'Rourke, J.R., Georges, S.A., Seay, H.R., Tapscott, S.J., McManus, M.T., Goldhamer,  
727 D.J., Swanson, M.S., and Harfe, B.D. (2007). Essential role for Dicer during skeletal  
728 muscle development. *Dev Biol* *311*, 359-368.

729 Ohana, R., Weiman-Kelman, B., Raviv, S., Tamm, E.R., Pasmanik-Chor, M., Rinon, A.,  
730 Netanel, D., Shamir, R., Solomon, A.S., and Ashery-Padan, R. (2015). MicroRNAs are  
731 essential for differentiation of the retinal pigmented epithelium and maturation of  
732 adjacent photoreceptors. *Development* *142*, 2487-2498.

733 Olguín, H.C., and Pisconti, A. (2012). Marking the tempo for myogenesis: Pax7 and the  
734 regulation of muscle stem cell fate decisions. *J Cell Mol Med* *16*, 1013-1025.

735 Parker, M.H., Seale, P., and Rudnicki, M.A. (2003). Looking back to the embryo:  
736 defining transcriptional networks in adult myogenesis. *Nat Rev Genet* *4*, 497-507.

737 Ran, F.A., Hsu, P.D., Wright, J., Agarwala, V., Scott, D.A., and Zhang, F. (2013).  
738 Genome engineering using the CRISPR-Cas9 system. *Nat Protoc* *8*, 2281-2308.

739 Rao, P.K., Kumar, R.M., Farkhondeh, M., Baskerville, S., and Lodish, H.F. (2006).  
740 Myogenic factors that regulate expression of muscle-specific microRNAs. *Proc Natl*  
741 *Acad Sci U S A* *103*, 8721-8726.

742 Rasmussen, K.D., Simmini, S., Abreu-Goodger, C., Bartonicek, N., Di Giacomo, M.,  
743 Bilbao-Cortes, D., Horos, R., Von Lindern, M., Enright, A.J., and O'Carroll, D. (2010).  
744 The miR-144/451 locus is required for erythroid homeostasis. *J Exp Med* *207*, 1351-  
745 1358.



746 Rosa, A., Spagnoli, F.M., and Brivanlou, A.H. (2009). The miR-430/427/302 family  
747 controls mesendodermal fate specification via species-specific target selection. *Dev Cell*  
748 *16*, 517-527.

749 Rudnicki, M.A., Braun, T., Hinuma, S., and Jaenisch, R. (1992). Inactivation of MyoD in  
750 mice leads to up-regulation of the myogenic HLH gene Myf-5 and results in apparently  
751 normal muscle development. *Cell* *71*, 383-390.

752 Rudnicki, M.A., Schnegelsberg, P.N., Stead, R.H., Braun, T., Arnold, H.H., and  
753 Jaenisch, R. (1993). MyoD or Myf-5 is required for the formation of skeletal muscle. *Cell*  
754 *75*, 1351-1359.

755 Sarkar, S., Dey, B.K., and Dutta, A. (2010). MiR-322/424 and -503 are induced during  
756 muscle differentiation and promote cell cycle quiescence and differentiation by down-  
757 regulation of Cdc25A. *Mol Biol Cell* *21*, 2138-2149.

758 Schneider, C.A., Rasband, W.S., and Eliceiri, K.W. (2012). NIH Image to ImageJ: 25  
759 years of image analysis. *Nat Methods* *9*, 671-675.

760 Sempere, L.F., Freemantle, S., Pitha-Rowe, I., Moss, E., Dmitrovsky, E., and Ambros, V.  
761 (2004). Expression profiling of mammalian microRNAs uncovers a subset of brain-  
762 expressed microRNAs with possible roles in murine and human neuronal differentiation.  
763 *Genome Biol* *5*, R13.

764 Sokol, N.S., and Ambros, V. (2005). Mesodermally expressed *Drosophila* microRNA-1 is  
765 regulated by Twist and is required in muscles during larval growth. *Genes Dev* *19*, 2343-  
766 2354.

767 Subramanian, A., Tamayo, P., Mootha, V.K., Mukherjee, S., Ebert, B.L., Gillette, M.A.,  
768 Paulovich, A., Pomeroy, S.L., Golub, T.R., Lander, E.S., *et al.* (2005). Gene set

769 enrichment analysis: a knowledge-based approach for interpreting genome-wide  
770 expression profiles. *Proc Natl Acad Sci U S A* 102, 15545-15550.

771 Sweetman, D., Goljanek, K., Rathjen, T., Oustanina, S., Braun, T., Dalmay, T., and  
772 Münsterberg, A. (2008). Specific requirements of MRFs for the expression of muscle  
773 specific microRNAs, miR-1, miR-206 and miR-133. *Dev Biol* 321, 491-499.

774 Tapscott, S.J., Davis, R.L., Thayer, M.J., Cheng, P.F., Weintraub, H., and Lassar, A.B.  
775 (1988). MyoD1: a nuclear phosphoprotein requiring a Myc homology region to convert  
776 fibroblasts to myoblasts. *Science* 242, 405-411.

777 Townley-Tilson, W.H., Callis, T.E., and Wang, D. (2010). MicroRNAs 1, 133, and 206:  
778 critical factors of skeletal and cardiac muscle development, function, and disease. *Int J*  
779 *Biochem Cell Biol* 42, 1252-1255.

780 Vauchez, K., Marolleau, J.P., Schmid, M., Khattar, P., Chapel, A., Catelain, C., Lecourt,  
781 S., Largh ero, J., Fiszman, M., and Vilquin, J.T. (2009). Aldehyde dehydrogenase activity  
782 identifies a population of human skeletal muscle cells with high myogenic capacities. *Mol*  
783 *Ther* 17, 1948-1958.

784 Vella, J.B., Thompson, S.D., Bucsek, M.J., Song, M., and Huard, J. (2011). Murine and  
785 human myogenic cells identified by elevated aldehyde dehydrogenase activity:  
786 implications for muscle regeneration and repair. *PLoS One* 6, e29226.

787 Ventura, A., Young, A.G., Winslow, M.M., Lintault, L., Meissner, A., Erkeland, S.J.,  
788 Newman, J., Bronson, R.T., Crowley, D., Stone, J.R., *et al.* (2008). Targeted deletion  
789 reveals essential and overlapping functions of the miR-17 through 92 family of miRNA  
790 clusters. *Cell* 132, 875-886.

791 Vergara, H.M., Ramirez, J., Rosing, T., Nave, C., Blandino, R., Saw, D., Saraf, P.,  
792 Piexoto, G., Coombes, C., Adams, M., *et al.* (2018). miR-206 is required for changes in

793 cell adhesion that drive muscle cell morphogenesis in *Xenopus laevis*. *Dev Biol* 438, 94-  
794 110.

795 Wang, C.C., Bajikar, S.S., Jamal, L., Atkins, K.A., and Janes, K.A. (2014). A time- and  
796 matrix-dependent TGFBR3-JUND-KRT5 regulatory circuit in single breast epithelial cells  
797 and basal-like premalignancies. *Nat Cell Biol* 16, 345-356.

798 Wang, D., Zhang, Z., O'Loughlin, E., Wang, L., Fan, X., Lai, E.C., and Yi, R. (2013).  
799 MicroRNA-205 controls neonatal expansion of skin stem cells by modulating the PI(3)K  
800 pathway. *Nat Cell Biol* 15, 1153-1163.

801 Wang, Y., Medvid, R., Melton, C., Jaenisch, R., and Blelloch, R. (2007). DGCR8 is  
802 essential for microRNA biogenesis and silencing of embryonic stem cell self-renewal.  
803 *Nat Genet* 39, 380-385.

804 Williams, A.H., Valdez, G., Moresi, V., Qi, X., McAnally, J., Elliott, J.L., Bassel-Duby, R.,  
805 Sanes, J.R., and Olson, E.N. (2009). MicroRNA-206 delays ALS progression and  
806 promotes regeneration of neuromuscular synapses in mice. *Science* 326, 1549-1554.

807 Wystub, K., Besser, J., Bachmann, A., Boettger, T., and Braun, T. (2013). miR-1/133a  
808 clusters cooperatively specify the cardiomyogenic lineage by adjustment of myocardin  
809 levels during embryonic heart development. *PLoS Genet* 9, e1003793.

810 Wüst, S., Dröse, S., Heidler, J., Wittig, I., Klockner, I., Franko, A., Bonke, E., Günther,  
811 S., Gärtner, U., Boettger, T., *et al.* (2018). Metabolic Maturation during Muscle Stem Cell  
812 Differentiation Is Achieved by miR-1/133a-Mediated Inhibition of the Dlk1-Dio3 Mega  
813 Gene Cluster. *Cell Metab* 27, 1026-1039.e1026.

814 Yu, G., Wang, L.G., Han, Y., and He, Q.Y. (2012). clusterProfiler: an R package for  
815 comparing biological themes among gene clusters. *OMICS* 16, 284-287.

816 Yuasa, K., Hagiwara, Y., Ando, M., Nakamura, A., Takeda, S., and Hijikata, T. (2008).  
817 MicroRNA-206 is highly expressed in newly formed muscle fibers: implications regarding  
818 potential for muscle regeneration and maturation in muscular dystrophy. *Cell Struct*  
819 *Funct* 33, 163-169.

820 Zammit, P.S., Relaix, F., Nagata, Y., Ruiz, A.P., Collins, C.A., Partridge, T.A., and  
821 Beauchamp, J.R. (2006). Pax7 and myogenic progression in skeletal muscle satellite  
822 cells. *J Cell Sci* 119, 1824-1832.

823 Zhang, X., Zuo, X., Yang, B., Li, Z., Xue, Y., Zhou, Y., Huang, J., Zhao, X., Zhou, J.,  
824 Yan, Y., *et al.* (2014). MicroRNA directly enhances mitochondrial translation during  
825 muscle differentiation. *Cell* 158, 607-619.

826 Zhao, C., Sun, G., Li, S., and Shi, Y. (2009). A feedback regulatory loop involving  
827 microRNA-9 and nuclear receptor TLX in neural stem cell fate determination. *Nat Struct*  
828 *Mol Biol* 16, 365-371.

829 Zhao, Y., Ransom, J.F., Li, A., Vedantham, V., von Drehle, M., Muth, A.N., Tsuchihashi,  
830 T., McManus, M.T., Schwartz, R.J., and Srivastava, D. (2007). Dysregulation of  
831 cardiogenesis, cardiac conduction, and cell cycle in mice lacking miRNA-1-2. *Cell* 129,  
832 303-317.

833 Zhao, Y., Samal, E., and Srivastava, D. (2005). Serum response factor regulates a  
834 muscle-specific microRNA that targets Hand2 during cardiogenesis. *Nature* 436, 214-  
835 220.

836 Zhu, Y., Wang, D., Wang, F., Li, T., Dong, L., Liu, H., Ma, Y., Jiang, F., Yin, H., Yan, W.,  
837 *et al.* (2013). A comprehensive analysis of GATA-1-regulated miRNAs reveals miR-23a  
838 to be a positive modulator of erythropoiesis. *Nucleic Acids Res* 41, 4129-4143.

839

840

841 **Supplemental item titles**

842 *Table S1.* Oligonucleotides used in this study.

843 *Table S2.* Expression of *miR-206/1a* targets based on RNA-seq results.

844 *Table S3.* Expression of *miR-133* family based on small RNA-seq results.

845 **Figure legend**

846 *Figure 1.* Simultaneous knockout of *miR-206*, *miR-1a-1* and *miR-1a-2* in C2C12 murine  
847 myoblast does not block cell differentiation

848 A) Scheme of CRISPR/Cas9 experiment design. Blue blocks represent genes, orange  
849 lines sgRNAs sequences and black arrow genotyping primers localization. Left: *miR-*  
850 *206*, middle: *miR-1a-1*, right: *miR-1a-2*.

851 B) Representative picture of PCR genotyping results of triple KO C2C12 cells. Left: *miR-*  
852 *206*, middle: *miR-1a-1*, right: *miR-1a-2*. Top band – wild-type size, bottom band – KO  
853 size.

854 C) Representative picture of Sanger sequencing confirmation of the genotyping PCR  
855 product in tKO C1 C2C12 clone.

856 D) qRT-PCR analysis of differentiating (DM3) control cells (Ctrl) and triple KO clones  
857 (tKO C1 and tKO C2). Levels of pre-miRNAs were normalized to *Gapdh* and miRNAs –  
858 to *U6* snRNA. Levels are shown relative to control cells (Ctrl DM3). Values represent  
859 three biological replicates, presented as mean +/- SEM. Statistical significance was  
860 calculated using t-student test. (\*\*\*) indicates p-value =< 0.001.

861 E) qRT-PCR analysis of proliferating (GM) and differentiating (DM3) control cells (Ctrl)  
862 and triple KO clones (tKO C1 and tKO C2). Levels of *Myod1*, *Myogenin* and *Myh3*  
863 mRNAs were normalized to *Gapdh* and shown relative to control cells (Ctrl DM3) in box  
864 and whiskers plots. Values represent four biological replicates, black line represents  
865 median. Statistical significance was calculated using t-student test.

866 F) Representative Western blot of time course of differentiation (GM, DM1, DM3, DM5)  
867 of control cells (Ctrl) and triple KO clones (tKO C1 and tKO C2). Protein levels for  
868 MYOGENIN and MHC were measured. HSP90 serves as a loading control.

869 G) Immunofluorescence analysis of fixed cells 5 days after differentiation (DM5). Cells  
870 were immunostained with antibodies against MHC. Hoechst 33342 was used to visualize  
871 nuclei. Quantification of the fusion index is presented on the right side. White line =  
872 200 $\mu$ m.

873  
874 *Figure 2.* RNAseq analysis confirms the tKO cells differentiate, but they have lower  
875 mitochondrial respiratory capacity than control cells during differentiation

876 A) Heatmap showing clustering of all RNA-seq samples and conditions based on  
877 expression (FPKM $\geq$ 1) in proliferating conditions (left) and in differentiating conditions  
878 (right) in control cells (Ctrl1 and Ctrl 2) and triple KO clones (KO1 and KO2). There are  
879 two biological replicates for each condition (BR1 and BR2).

880 B) MA plots representing differentially expressed genes between control cells and triple  
881 KO clones in proliferation (top) and differentiation conditions (bottom). Upregulated  
882 genes are presented in blue and downregulated in red ( $p_{adj}$ <0.01).

883 C) Top 15 significant Gene Ontology terms enriched in downregulated genes in  
884 differentiating triple KO clones (tKO) in comparison to differentiating control cells (Ctrl).  
885 Red arrows show gene terms related to muscle development and regeneration. (\*\*\*)  
886 indicates  $p_{adj} \leq 0.001$

887 D) Enrichment plot from gene set enrichment analysis (GSEA) showing the gene set  
888 involved in oxidative phosphorylation is enriched among differentially downregulated  
889 genes in differentiating tKO clones versus differentiating control cells.

890 E) Oxygen Consumption Rate (OCR) of differentiating (DM1) tKO C2C12 clones and  
891 control C2C12 cells measured at basal conditions and after the administration of the

892 indicated compounds. Values represent five biological replicates, presented as mean  
893 +/- SEM. Levels are shown relative to the total protein content.

894 F) Maximal Respiration of control C2C12 cells and tKO clones in differentiation (DM1).  
895 Values represent five biological replicates, presented relative to control cells as mean  
896 +/- SEM. (\*\*), (\*\*\*) indicates  $p_{adj} < 0.01$  and  $0.001$  respectively. Levels are shown  
897 relative to the total protein content and control cells.

898

899 *Figure 3. Targets of miR-206/-1a are specifically upregulated in differentiating triple KO*  
900 *clones and are not affected by differentially expressed miRNAs.*

901 A) Top: Cumulative distribution function (CDF) plot showing no change of the *miR-206/-*  
902 *1* targets in proliferating triple KO clones (KO) versus control cells (Ctrl). The curves for  
903 the microRNA targets and non-targets are virtually superimposed. Bottom: Histogram of  
904 fraction of the *miR-206/-1* targets, among all bins arranged from the most repressed to  
905 most induced in tKO vs Ctrl cells in growth medium. The genes are ranked from the  
906 most downregulated (blue) to the most upregulated (red). The horizontal line depicts the  
907 uniform distribution expected under the null hypothesis. Targets are based on match to  
908 7mer sequence.

909 B) Top: Cumulative distribution function (CDF) plot showing upregulation of *miR-206/-1*  
910 targets in differentiating triple KO clones (KO) versus differentiating control cells (Ctrl).  
911 Bottom: Histogram similar to that in Figure 3A, but in differentiating medium.

912 C) MA plots to identify differentially expressed miRNAs between control cells and triple  
913 KO clones in proliferation (top) and differentiation conditions (bottom). The microRNA  
914 abundance was measured by small RNA-seq. Upregulated microRNAs are presented in  
915 blue and downregulated in red ( $p_{adj} < 0.1$ ).



916  
917 *Figure 4. Knockout of miR-206, miR-1a-1 and miR-1a-2 leads to partial embryonic*  
918 *lethality and diminishes adult mice physical potential*

919 A) Scheme of animal crosses leading to generation of triple KO mice.

920 B) Genotypes of offspring generated from *miR-206* KO *miR-1a-1* HET *miR-1a-2*  
921 intercrosses. In total 127 animals were genotyped. Percentage of expected and  
922 observed genotypes are given for weaning-age (3-week-old) pups. (\*\*\*) indicates p-  
923 value  $\leq 0.001$

924 C) qRT-PCR analysis of microRNAs in TA skeletal; muscles from control wild-type (WT,  
925 n=3) and triple KO (tKO, n=2) animals. Levels of miRNAs were normalized to *U6*  
926 snRNA. Levels are shown relative to WT. Values presented as mean  $\pm$  SD. Statistical  
927 significance was calculated using t-student test. (\*\*\*) indicates p-value  $\leq 0.001$ .

928 D) Animal weight used for physical performance tests. Statistical significance was  
929 calculated using t-student test. (\*\*\*) indicates p-value  $\leq 0.001$ . (\*) indicates p-value  $\leq$   
930 0.05. N = 13 for all genotypes, except for *miR-206&1-1&1-2* tKO (N = 2).

931 E) Forelimb grip strength measured using grid normalized to respective body weights.  
932 Values presented as mean  $\pm$  SD. Statistical significance was calculated using t-  
933 student test. (\*\*\*) indicates p-value  $\leq 0.001$  in comparison to WT mice. (†††), (††), (†)  
934 indicates p-value  $\leq 0.001$ ,  $\leq 0.01$ ,  $\leq 0.05$  respectively in comparison to tKO mice. N =  
935 13 for all genotypes, except for *miR-206&1-1&1-2* tKO (N = 2).

936 F) Top: Latency to fall measured using rotating rod. Values presented as mean  $\pm$  SD.  
937 N = 13 for all genotypes, except for *miR-206&1-1&1-2* tKO (N = 2). Bottom: Statistical  
938 significance heatmap calculated using one-way ANOVA test.

939 G) Maximum speed of rotation tolerated by the animals measured using rotating rod at  
940 the end of experiment (3<sup>rd</sup> day). Values presented as mean +/- SD. Statistical  
941 significance was calculated using t-student test. (\*\*\*) , (\*\*) indicates p-value =< 0.001,  
942 =<0.01 respectively in comparison to WT mice. (†††), (†) indicates p-value =< 0.001, =<  
943 0.05 respectively in comparison to tKO mice. N = 13 for all genotypes, except for *miR-*  
944 *206&1-1&1-2* tKO (N = 2).

945  
946 *Figure 5.* Knockout of *miR-206*, *miR-1a-1* and *miR-1a-2* leads to smaller muscle fiber  
947 diameter, but does not alter the content of mitochondria or nuclei in skeletal muscles.

948 A) Quadriceps muscle (QU) weight from animals used in this study. Statistical  
949 significance was calculated using t-student test. N = 5 for all group, except *miR-206&1-*  
950 *1&1-2 tKO*, where N=2.

951 B) Representative picture of hematoxylin and eosin (H&E) staining of quadriceps muscle  
952 cross-section from WT and tKO mice. Black line = 100µm.

953 C) Quantification of average fiber size based on H&E staining. Statistical significance  
954 was calculated using t-student test. (\*\*\*) indicates p-value =< 0.001. N = 300 fibers per  
955 group.

956 D) Representative picture of anti-mitochondria staining of quadriceps muscle cross-  
957 section from WT and tKO mice. White line = 200µm.

958 E) Quantification of fiber mitochondria content based on anti-mitochondria staining. High  
959 mitochondria content fibers represent type I and IIa, low – type IIb and IIc. Statistical  
960 significance was calculated using t-student test. N = 600 fibers per group.

961 F) Quantification of nuclei per fiber number based on DAPI (nuclei) and anti-  
962 mitochondria (fibers) staining. Statistical significance was calculated using t-student test.  
963 N = 600 fibers per group.

964

### 965 **Supplemental figure legend**

966 *Supplemental figure 1.* Simultaneous knockout of miR-206, miR-1a-1 and miR-1a-2  
967 genes in PAX7 positive murine myoblast doesn't block differentiation, but slightly  
968 decreases MHC protein level

969 A) qRT-PCR analysis of differentiating (DM3) control cells (Ctrl) and triple KO clones  
970 (tKO C1 and tKO C2). Levels of pre-miRNAs were normalized to Gapdh and miRNAs –  
971 to U6 snRNA. Levels are shown relative to control cells (Ctrl DM3). Values represent  
972 three biological replicates, presented as mean +/- SEM. Statistical significance was  
973 calculated using t-student test. (\*\*\*) indicates p-value =< 0.001.

974 B) qRT-PCR analysis of proliferating (GM) and differentiating (DM3) control cells (Ctrl)  
975 and triple KO clones (tKO C1 and tKO C2). Levels of Myod1, Myogenin and Myh3  
976 mRNAs were normalized to Gapdh and shown relative to control cells (Ctrl DM3). Box  
977 and whiskers plot from three biological replicates with black line representing the  
978 median. Statistical significance was calculated using t-student test.

979 C) Western blot of proliferating (GM) and differentiating (DM1, DM3, DM5) control cells  
980 (Ctrl) and triple KO clones (tKO C1 and tKO C2). Protein levels for MYOGENIN and  
981 MHC were measured. HSP90 serves as a loading control.

982

983 *Supplemental figure 2.* Lack of miR-206/-1a leads to mitochondria function impairment in  
984 C2C12 cells

985 A) Top 10 significant Gene Ontology terms enriched in genes upregulated during  
986 differentiation of control cells (Ctrl). (\*\*\*) indicates  $p_{adj} \leq 0.001$

987 B) Top 10 significant Gene Ontology terms enriched in genes upregulated during  
988 differentiation of triple KO clones (tKO1 and tKO2). (\*\*\*) indicates  $p_{adj} \leq 0.001$

989  
990 *Supplemental figure 3.* Differentially expressed miRNAs in triple KO cells do not share  
991 seed-sequence with miR-206/-1a and so are unlikely to repress miR-206/-1a targets.

992 A) miRNAs downregulated in proliferating triple KO clones versus control cells.  $p_{adj} \leq$   
993 0.1

994 B) miRNAs upregulated in proliferating triple KO clones versus control cells.  $p_{adj} \leq 0.1$

995 C) miRNAs down- and upregulated in differentiating triple KO clones versus control  
996 cells.  $p_{adj} \leq 0.1$

997  
998 *Supplemental figure 4.* Mice with triple knockout of miR-206, miR-1a-1 and miR-1a-2  
999 show high levels of heart fibrosis.

1000 A) Hearts weight from animals used in this study. Statistical significance was calculated  
1001 using t-student test.  $N = 5$  for all group, except miR-206&1-1&1-2 tKO, where  $N=2$ .

1002 B) Representative picture of Masson's trichrome staining of heart section from WT, miR-  
1003 206 miR-1a-1 dKO, miR-206 miR-1a-2 dKO and miR-206 miR-1a-1 miR-1a-2 tKO mice.

1004 Black line = 100 $\mu$ m

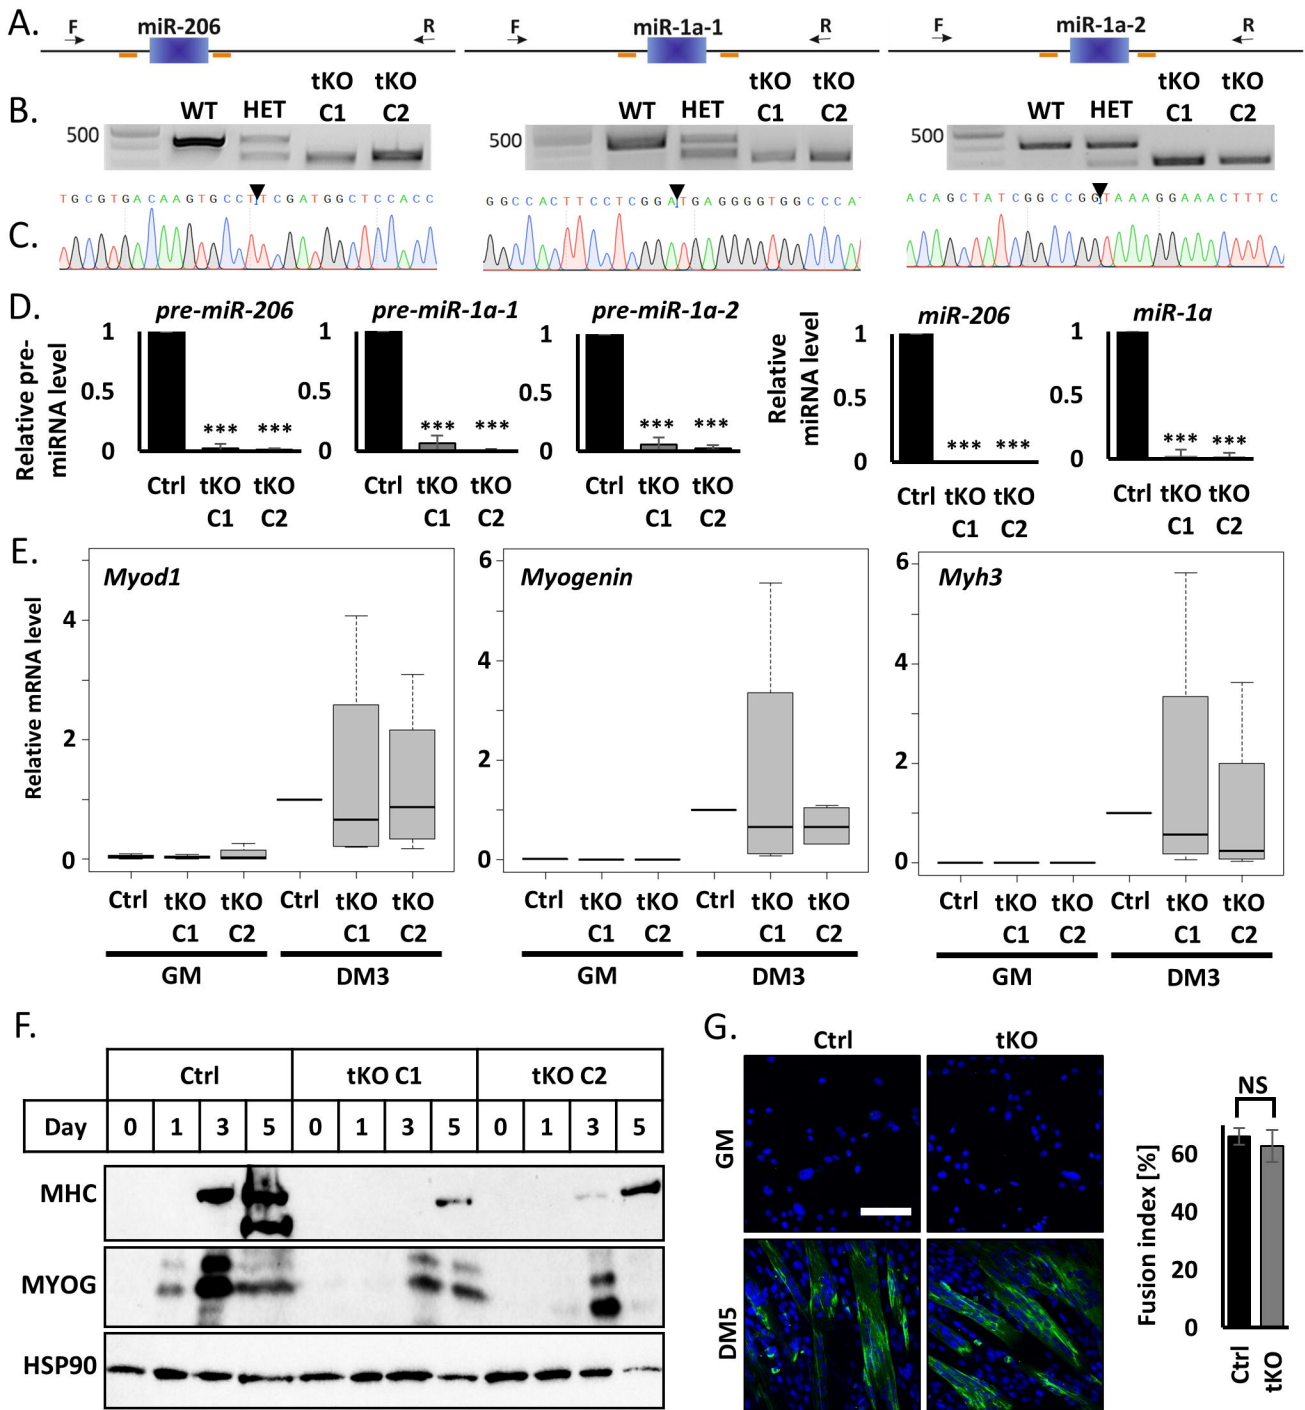

**FIGURE 1.**

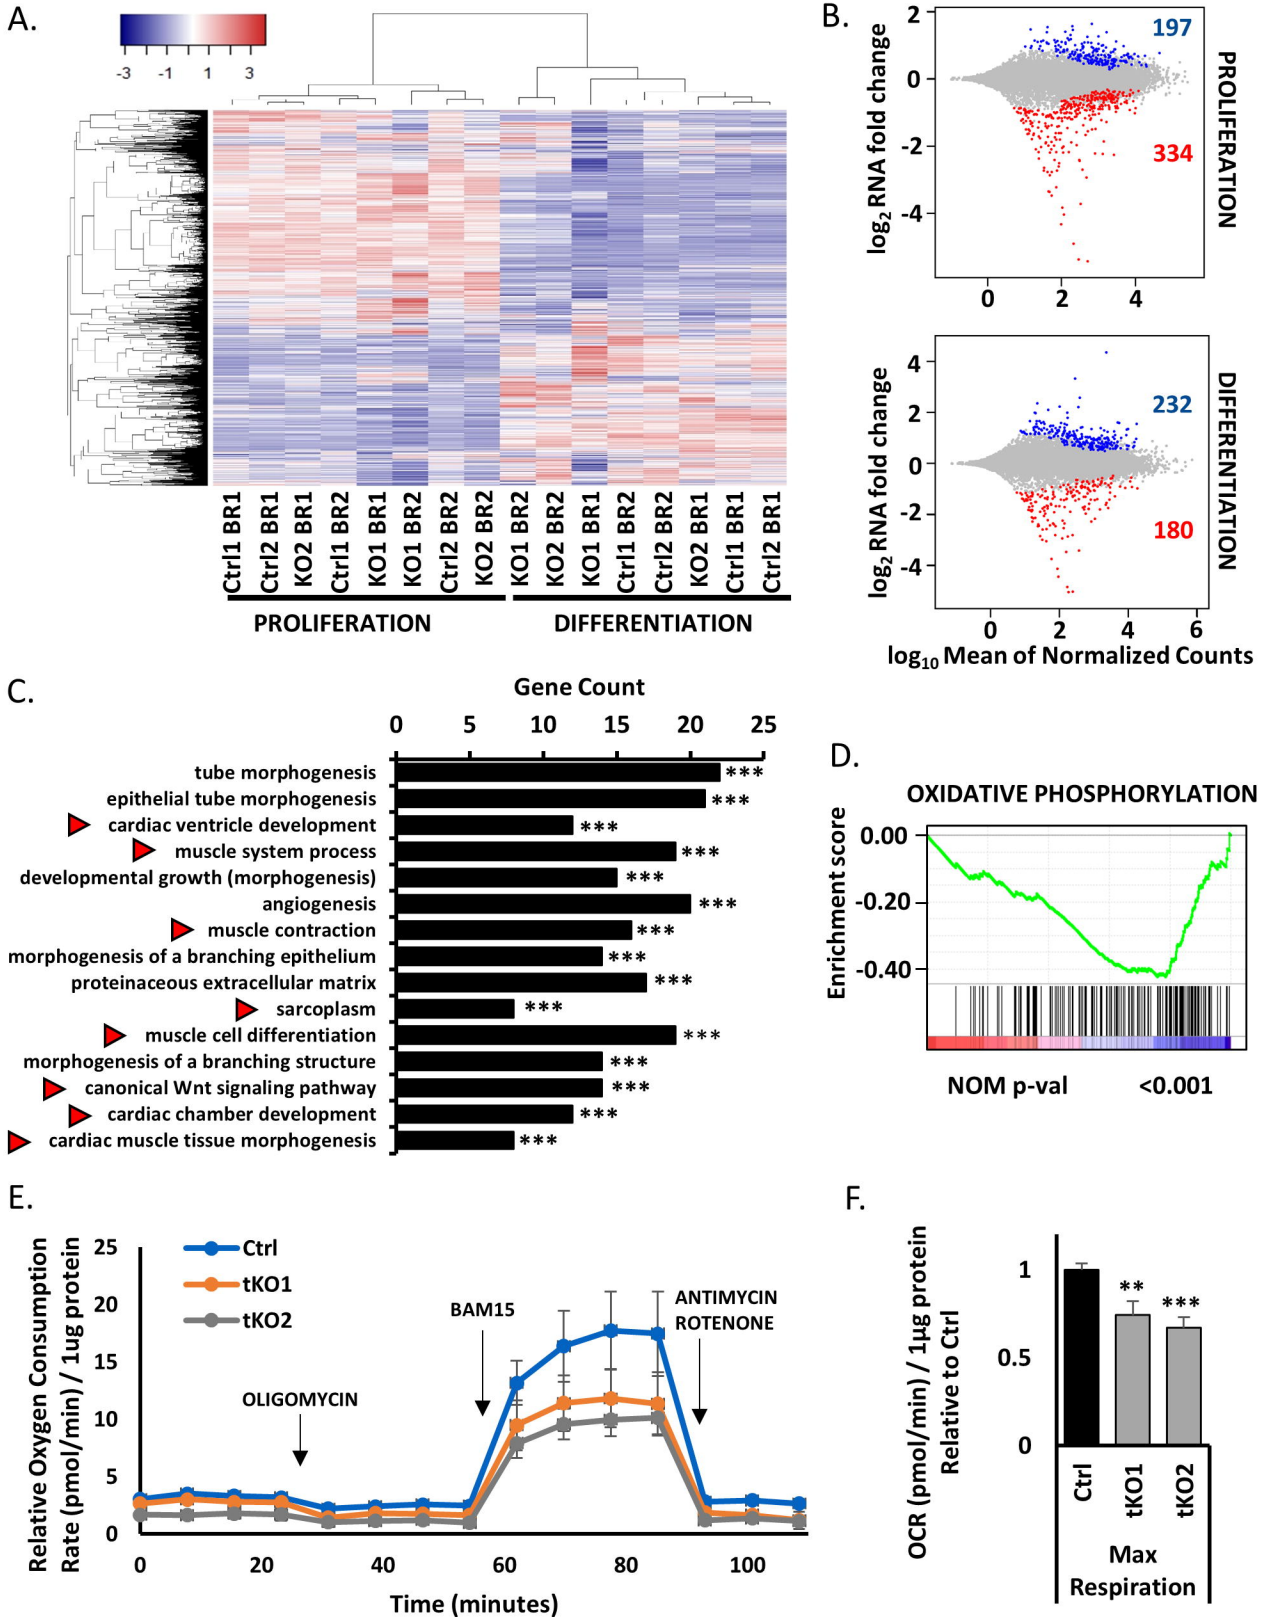

**FIGURE 2.**

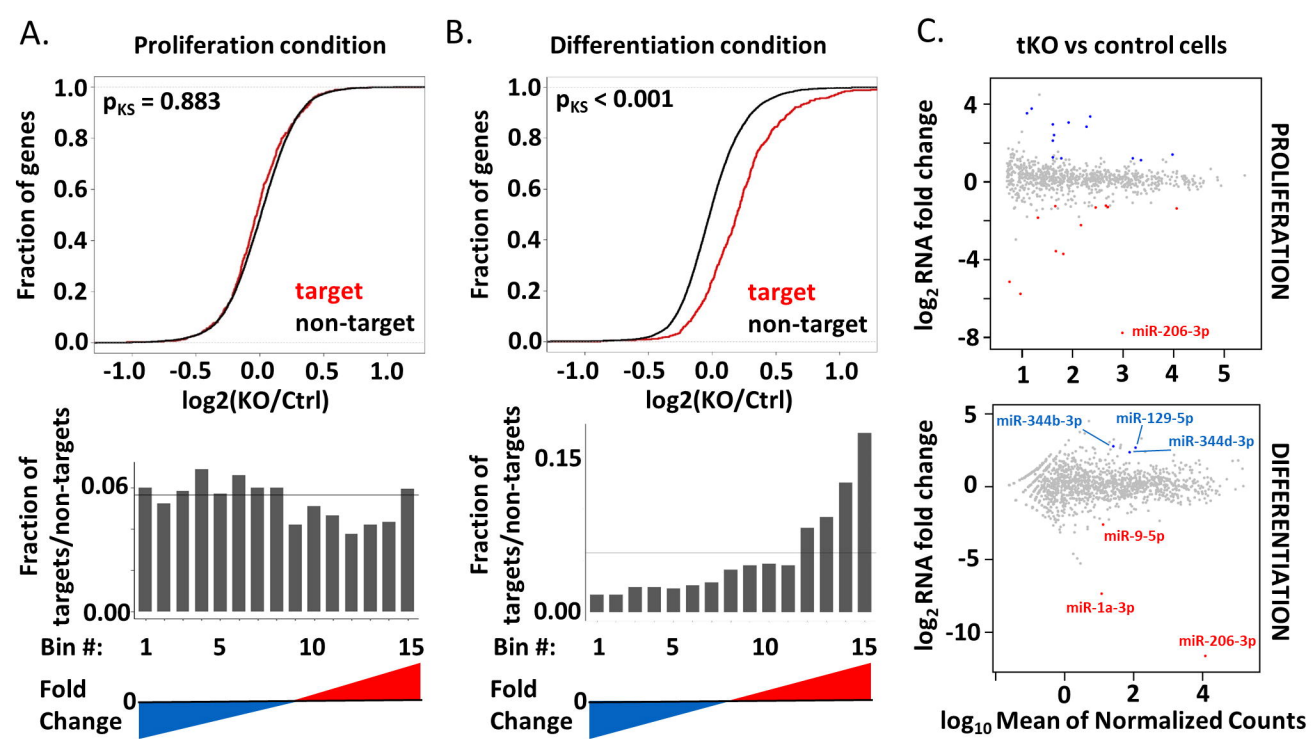

**FIGURE 3.**

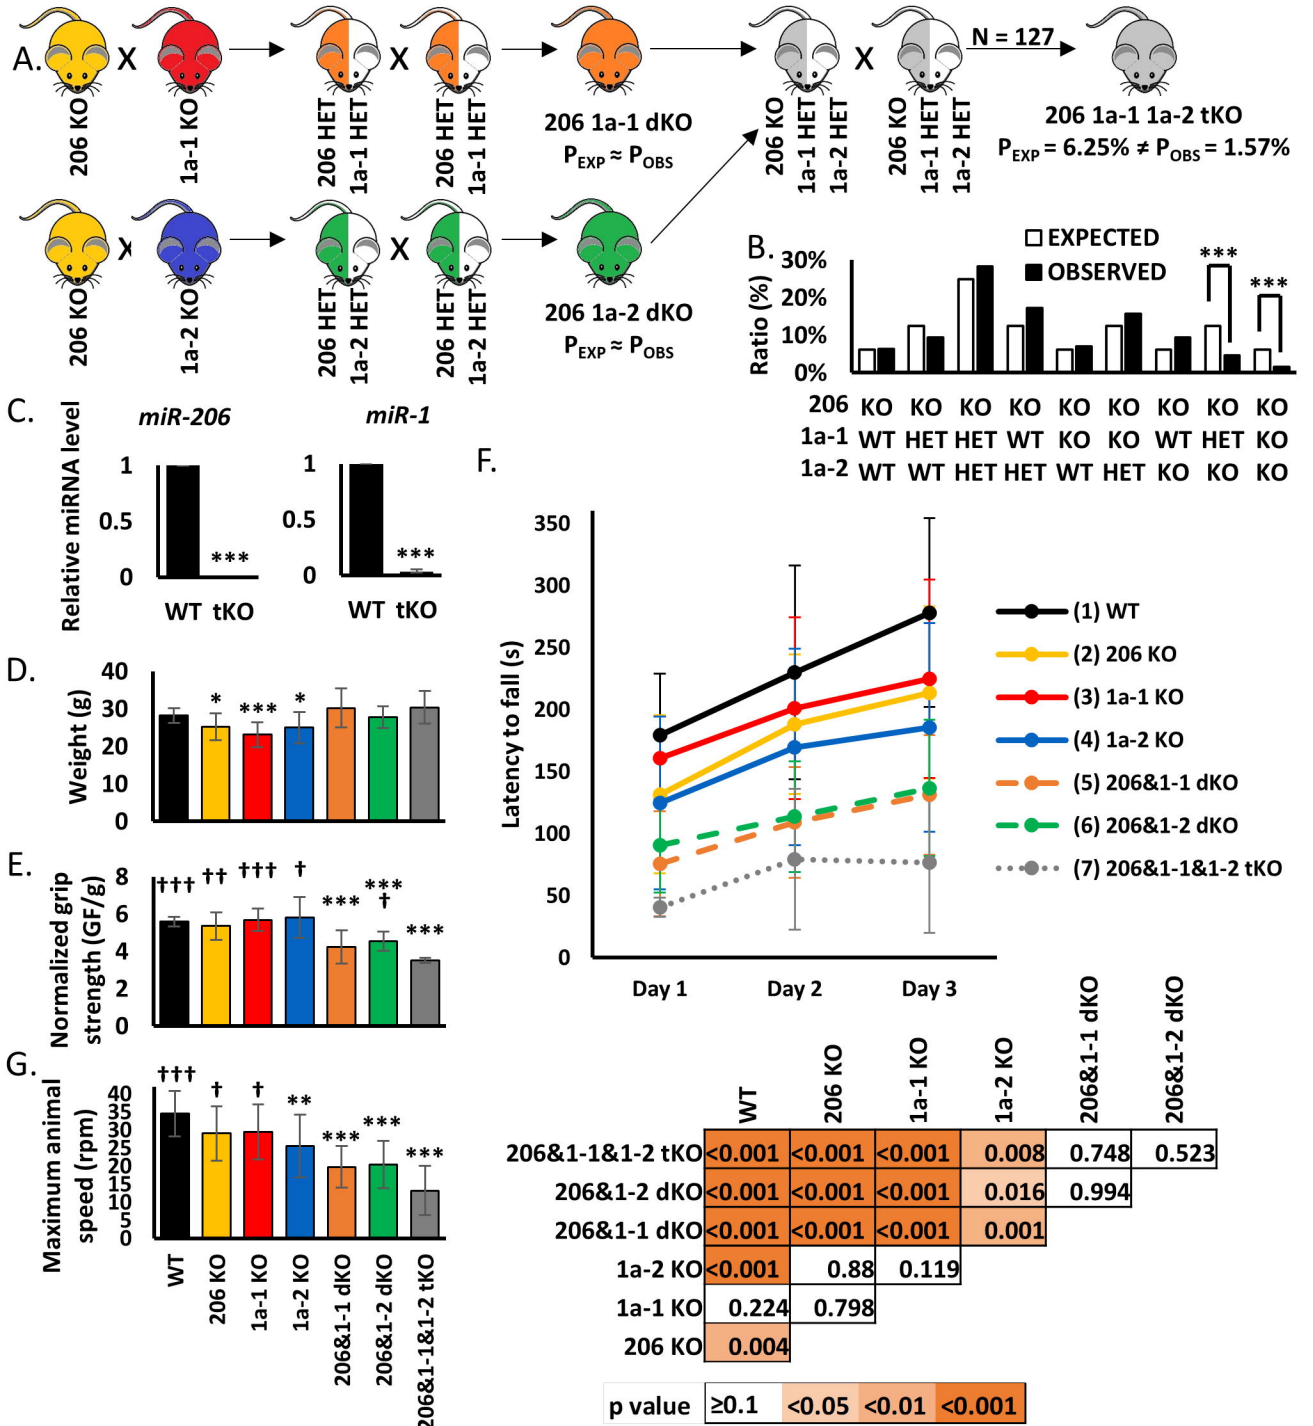

**FIGURE 4.**



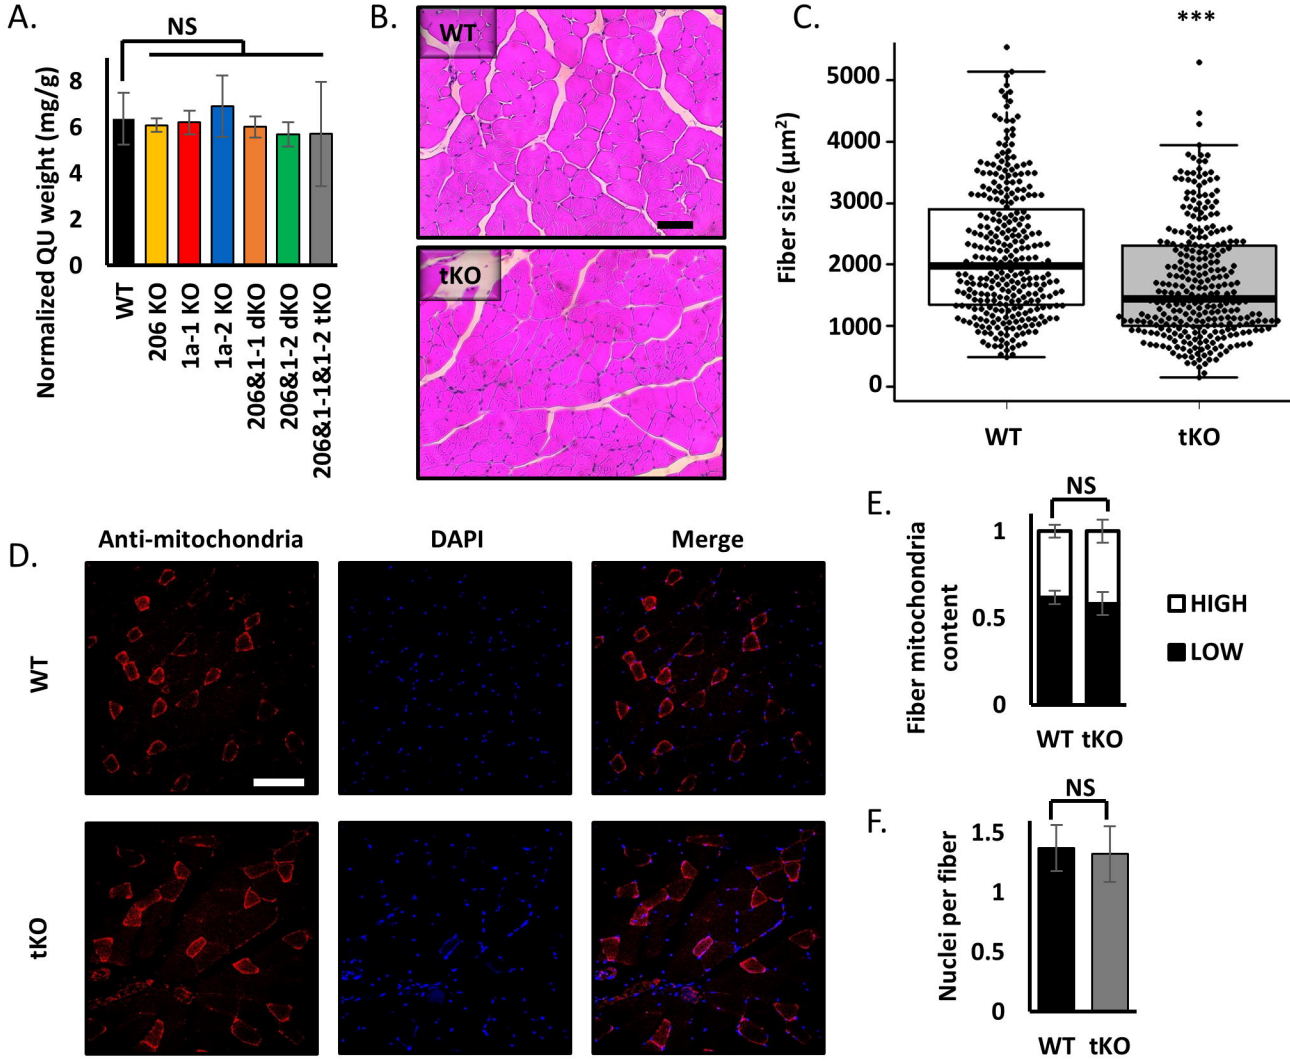

**FIGURE 5.**

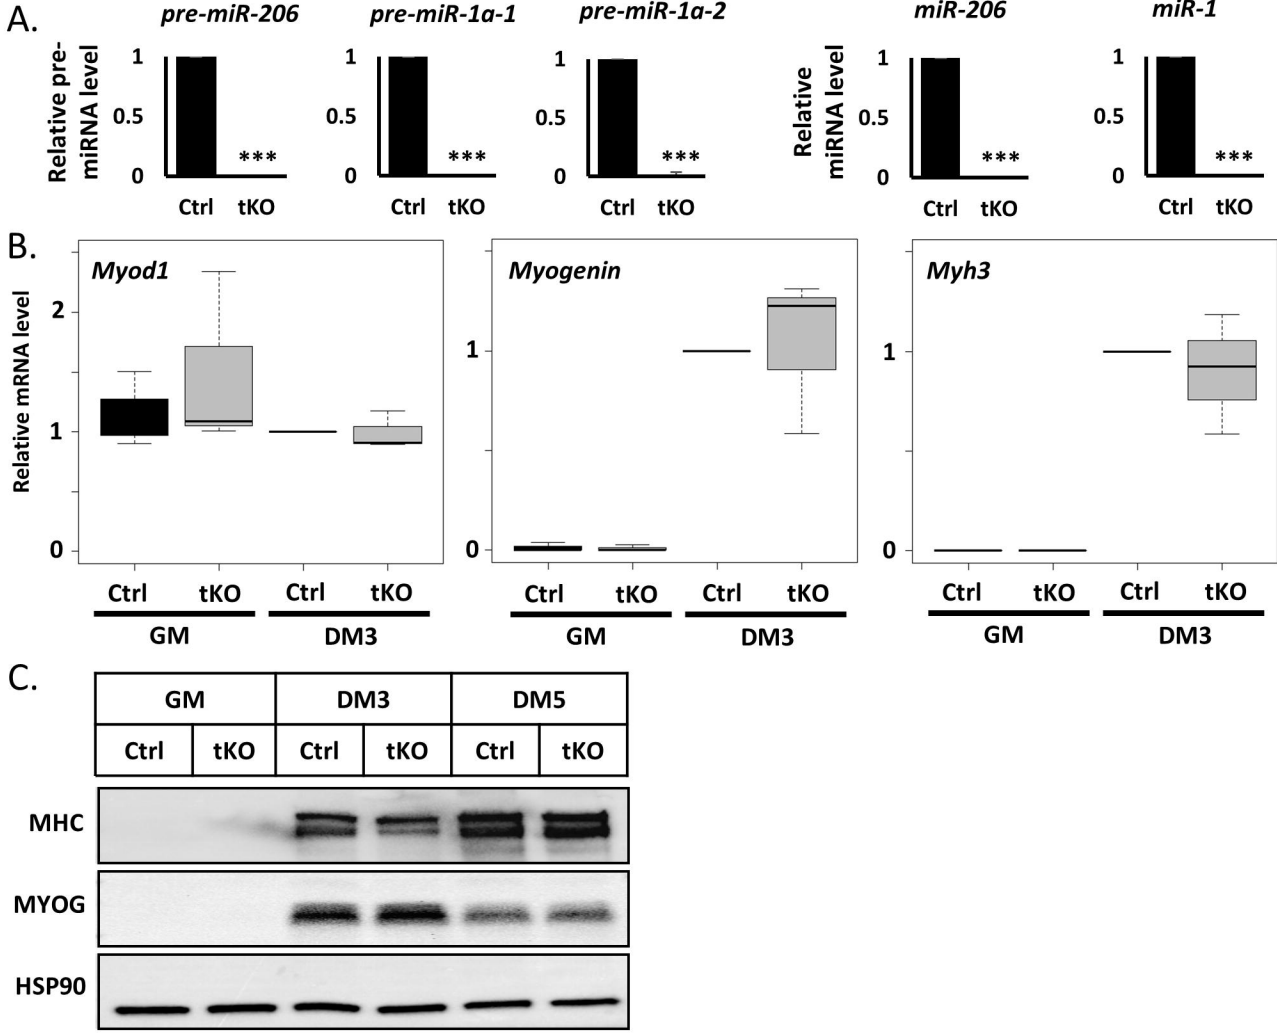

**FIGURE S1.**

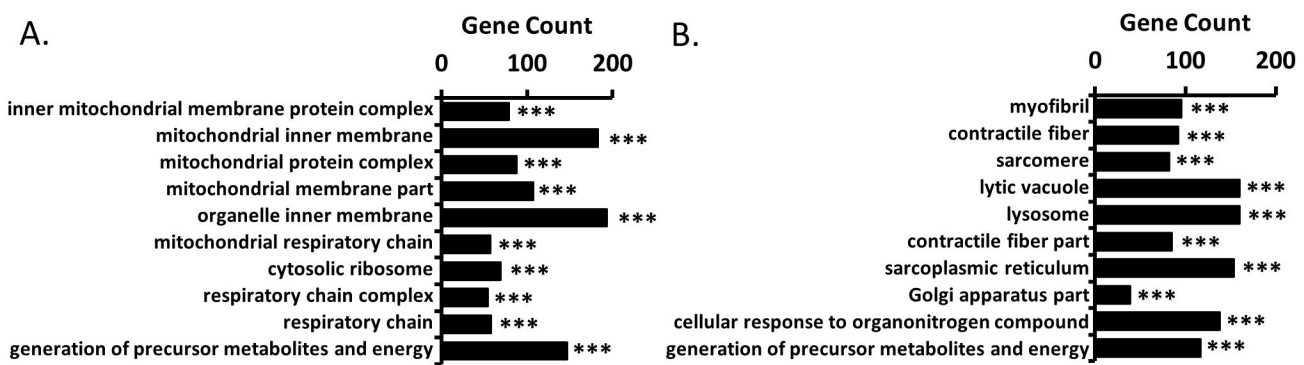

**FIGURE S2.**

**A. tKO vs control cells  
Proliferation**

| DOWNREGULATED miRNA |        |        |
|---------------------|--------|--------|
| Gene name           | log2FC | padj   |
| miR-206-3p          | -7.76  | <0.001 |
| miR-669c-5p         | -5.76  | <0.001 |
| miR-467c-5p         | -5.13  | 0.003  |
| miR-9-1-5p          | -3.71  | <0.001 |
| miR-9-5p            | -3.56  | <0.001 |
| miR-883a-3p         | -2.23  | 0.074  |
| miR-126a-3p         | -1.85  | 0.049  |
| miR-99a-5p          | -1.36  | 0.090  |
| miR-181d-5p         | -1.32  | 0.066  |
| miR-465c-2-5p       | -1.29  | 0.009  |
| miR-743b-5p         | -1.25  | 0.088  |
| miR-465a-3p         | -1.24  | 0.100  |

**B. tKO vs control cells  
Proliferation**

| UPREGULATED miRNA |        |        |
|-------------------|--------|--------|
| Gene name         | log2FC | padj   |
| miR-196a-1-3p     | 3.78   | 0.039  |
| miR-129-2-3p      | 3.52   | 0.008  |
| miR-129-5p        | 3.36   | <0.001 |
| miR-344d-3-3p     | 3.04   | <0.001 |
| miR-129-2-5p      | 2.95   | 0.001  |
| miR-344d-3p       | 2.83   | <0.001 |
| miR-344b-3p       | 2.42   | 0.001  |
| miR-1291-3p       | 2.12   | <0.001 |
| miR-10a-5p        | 1.40   | 0.002  |
| miR-452-5p        | 1.27   | 0.039  |
| miR-344-3p        | 1.22   | 0.039  |
| miR-224-5p        | 1.21   | <0.001 |
| miR-139-5p        | 1.11   | 0.026  |

**C. tKO vs control cells  
Differentiation**

| DOWNREGULATED miRNA |        |        |
|---------------------|--------|--------|
| Gene name           | log2FC | padj   |
| miR-206-3p          | -11.61 | <0.001 |
| miR-1a-3p           | -7.35  | <0.001 |
| miR-9-5p            | -2.59  | 0.093  |
| UPREGULATED miRNA   |        |        |
| Gene name           | log2FC | padj   |
| miR-344b-3p         | 2.77   | 0.015  |
| miR-129-5p          | 2.68   | 0.031  |
| miR-344d-3p         | 2.38   | <0.001 |

**FIGURE S3.**

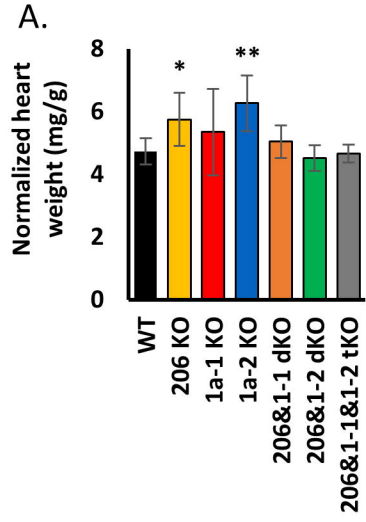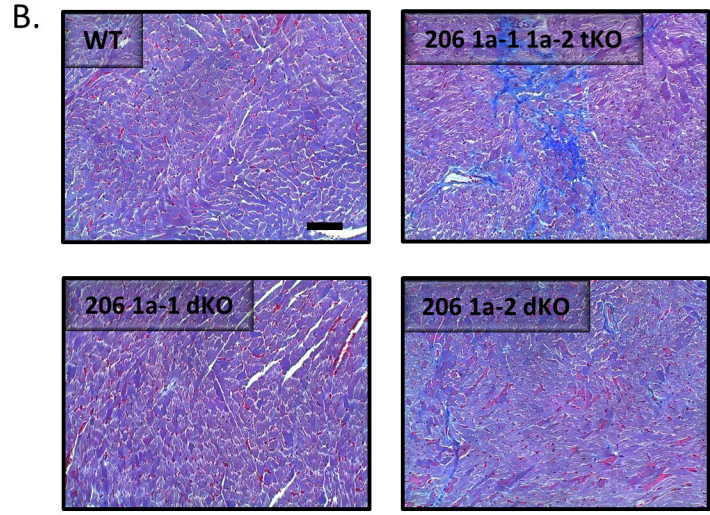

**FIGURE S4.**
